# Supplementary material
Source: ML conference proceedings conference paper supplement (https://openreview.net/forum?id=cx45ACt9Lg)
Supplement: supplementary_material [file paper_with_appendix.pdf › neurips25_supplementary/paper_with_appendix.pdf]

---

# The third pillar of causal analysis? A measurement perspective on causal representations

---

Anonymous Author(s)

Affiliation

Address

email

## Abstract

1 Causal reasoning and discovery, two fundamental tasks of causal analysis,  
2 often face challenges in applications due to the complexity, noisiness, and  
3 high-dimensionality of real-world data. Despite recent progress in identifying  
4 latent causal structures using causal representation learning (CRL), what makes  
5 learned representations useful for causal downstream tasks and how to evaluate  
6 them are still not well understood. In this paper, we reinterpret CRL using a  
7 measurement model framework, where the learned representations are viewed  
8 as proxy measurements of the latent causal variables. Our approach clarifies the  
9 conditions under which learned representations support downstream causal reason-  
10 ing and provides a principled basis for quantitatively assessing the quality of  
11 representations using a new Test-based Measurement EXclusivity (T-MEX) score.  
12 We validate T-MEX across diverse causal inference scenarios, including numeri-  
13 cal simulations and real-world ecological video analysis, demonstrating that the  
14 proposed framework and corresponding score effectively assess the identification  
15 of learned representations and their usefulness for causal downstream tasks.

## 16 1 Introduction

17 Causal analysis rests on two foundational pillars: causal reasoning and causal discovery. Causal  
18 reasoning operates under the assumption that the causal structure is known or can be assumed, and  
19 leverages data to make quantitative causal statements, for example, about the average effect of one  
20 variable on another. As causal structures are often unknown, causal discovery aims to uncover this  
21 structure, assuming that the causal variables of interest are readily observed. In many real-world  
22 settings, however, the causal variables may not be directly observable. While originally formulated  
23 mostly to enable causal capabilities in machine learning models, Causal Representation Learning  
24 (CRL, Schölkopf et al., 2021) has the potential to serve as a third pillar of causal analysis: enabling  
25 applications of causality involving unstructured data. For this, we reinterpret causal representation  
26 learning using the formalism of “*measurement models*” (Silva et al., 2006), wherein the learned  
27 representations serve as proxy measurements for latent causal variables. This perspective of CRL  
28 allows us to better characterize when a representation supports downstream causal reasoning, and  
29 it also provides a principled basis for quantitatively evaluating the quality of identification.

30 Methodologically, CRL tackles a more challenging task compared to independent component  
31 analysis (ICA) and disentanglement, where the latent variables are assumed to be independent of  
32 each other (Hyvärinen and Pajunen, 1999; Hyvärinen et al., 2019; Higgins et al., 2017; Locatello  
33 et al., 2019). Instead, CRL aims to unmix a set of causally related latent variables. Many recent  
34 causal representation learning works have provided different theoretical results for causal variable  
35 identification compiling various problem settings (von Kügelgen et al., 2021, 2024; Zhang et al.,  
36 2024b; Ahuja et al., 2024, 2022; Varici et al., 2024; Zhang et al., 2024a; Yao et al., 2024b; Kong

et al., 2022; Lippe et al., 2022b; Xie et al., 2024; Dong et al., 2024; Lachapelle et al., 2022, 2023; Yao et al., 2022; Zhang et al., 2024a; Squires et al., 2023; Buchholz et al., 2024; Kong et al., 2023), recently unified by (Yao et al., 2025) into a single general methodology. Although most of the results have been theoretical in nature, machine learning models explicitly empowered with identified causal structure have been shown to be more robust under distributional shifts and provide better out-of-distribution generalization (Fumero et al., 2024; Ahuja et al., 2021; Bareinboim and Pearl, 2016; Zhang et al., 2020; Rojas-Carulla et al., 2018). From an AI for science perspective, CRL has shown its potential in understanding climate physics from raw measurement data (Yao et al., 2024a), answering causal questions in the scope of ecology experiments (Cadei et al., 2024, 2025; Yao et al., 2025), psychometric studies (Dong et al., 2024), and countless more applications related to biomedicine (Zhang et al., 2024a; Sun et al., 2025; Ravuri et al., 2025; Jain et al., 2024).

Despite recent progress in identifying latent causal structures within causal representation learning, it remains unclear what makes learned representations useful for downstream causal tasks and how to best evaluate them. Building on the proposed measurement model framework, we introduce a new evaluation metric, the Test-based Measurement EXclusivity (T-MEX) Score, which effectively quantifies how well the learned representation aligns with the underlying measurement model. This underlying measurement model can be specified by, for instance, identifiability theory of a CRL algorithm (Fig. 1), assumptions for a particular causal reasoning task (Figs. 2 and 4), or ground truth knowledge. In contrast to commonly used CRL evaluation metrics, which suffer from clear limitations (§ 4), we demonstrate that T-MEX reliably assesses both the identifiability (Defn. B.1) and causal validity (Defn. 2.2) of learned representations, as shown in a wide range of causal reasoning tasks across numerical simulations and real-world ecological video analysis (§ 5). We summarize the main contributions of this paper as follows:

- We reinterpret CRL using a *measurement model* framework, wherein the learned representations serve as proxy measurements for latent causal variables (§ 2). This formalism provides a clearer characterization of both the identification quality of learned representation and its usefulness for causal downstream tasks.
- We propose a new evaluation metric (T-MEX) that quantifies the alignment of the representations and the underlying measurement model (§ 3), and we demonstrate its advantages over widely used CRL evaluation metrics that suffer from notable limitations (§ 4).
- Supported by theoretical analysis, our empirical evaluations confirm that T-MEX maintains validity and effectiveness across diverse causal reasoning scenarios, including treatment effect estimation and covariate adjustment in both numerical simulations and real-world ecological experiments (§ 5).

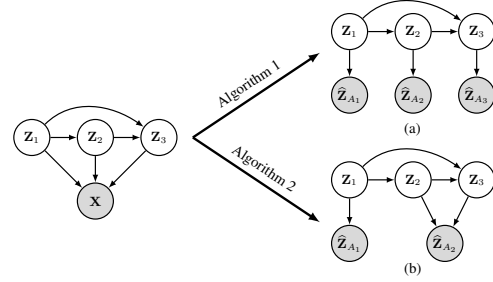

Figure 1: (Left) A measurement model where  $\mathbf{X}$  is a fully mixed measurement of the causal variables.  $\mathbf{X}$  is often termed the *observables* in CRL literature, representing the observed data. (Right) Two measurement models specified by different CRL identification algorithms: (a) Algorithm 1 guarantees one-to-one correspondence between the learned representation and causal variables; (b) Algorithm 2 guarantees that  $\hat{\mathbf{Z}}_{A1}$  corresponds to  $\mathbf{Z}_1$  while  $\hat{\mathbf{Z}}_{A2}$  represents a mixing of  $\mathbf{Z}_2$  and  $\mathbf{Z}_3$ .

## 2 CRL from A Measurement Model Perspective

**Notation.** Throughout, we write  $[N]$  as shorthand for the set  $\{1, \dots, N\}$ . Random vectors are denoted by bold uppercase letters (e.g.  $\mathbf{Z}$ ) and their realizations by bold lowercase (e.g.,  $\mathbf{z}$ ), indexed by superscripts. For instance,  $n$  samples of  $\mathbf{Z}$  are written as  $\{\mathbf{z}^k\}_{k \in [n]}$ . A vector  $\mathbf{Z}$  can be sliced either by a single index  $i \in [\dim(\mathbf{Z})]$  via  $\mathbf{Z}_i$  or a index subset  $A \subseteq [\dim(\mathbf{Z})]$  with  $\mathbf{Z}_A := \{\mathbf{Z}_i : i \in A\}$ .  $P_{\mathbf{Z}}$  denotes the probability distribution of the random vector  $\mathbf{Z}$  and  $p_{\mathbf{Z}}(\mathbf{z})$  denotes the associated probability density function (We omit the subscription and write  $p(\mathbf{z})$  when the context is clear). By default, a “measurable” function is *measurable* w.r.t. the Borel sigma algebras and is defined w.r.t. the Lebesgue measure. A more comprehensive summary of notations is provided in App. A.

## 2.1 The Measurement Model Framework

We formulate causal representation learning using a measurement model framework inspired by the formalism of (Silva et al., 2006).

**Definition 2.1** (Measurement model). Let  $\mathbf{V} = (\mathbf{Z}, \hat{\mathbf{Z}})$  be a collection of variables that can be partitioned into two sets: a set of latent *causal variables*  $\mathbf{Z} = \{\mathbf{Z}_1, \dots, \mathbf{Z}_N\}$  with  $\mathbf{Z}_i$  taking values in  $\mathbb{R}$  for all  $i \in [N]$ , and a set of observed *measurement variables*  $\hat{\mathbf{Z}} = \{\hat{\mathbf{Z}}_{A_1}, \dots, \hat{\mathbf{Z}}_{A_M}\}$  where for all  $j \in [M]$ ,  $\hat{\mathbf{Z}}_{A_j}$  takes values in  $\mathbb{R}^{D_j}$  with  $D_j \in \mathbb{N}_+$ , and it holds that  $\hat{\mathbf{Z}} \cap \mathbf{Z} = \emptyset$ .

A *measurement model*  $\mathcal{M} = \langle \mathbf{Z}, \hat{\mathbf{Z}}, \{h_j\}_{j=1}^M \rangle$  specifies that  $\hat{\mathbf{Z}}$  follows a deterministic structural causal model

$$\left\{ \hat{\mathbf{Z}}_{A_j} := h_j(\mathbf{Z}_{\text{pa}(\hat{\mathbf{Z}}_{A_j})}) \right\}_{j=1}^M,$$

where  $\text{pa}(\hat{\mathbf{Z}}_{A_j}) \subseteq [N]$  for all  $j \in [M]$ , and  $\mathbf{Z}_{\text{pa}(\hat{\mathbf{Z}}_{A_j})} \subseteq \mathbf{Z}$  are called the causal parents of  $\hat{\mathbf{Z}}_{A_j}$ .

The functions  $h_j$  for all  $j \in [M]$  are called the *measurement functions*. If for some  $j \in [M]$ ,  $|\text{pa}(\hat{\mathbf{Z}}_{A_j})| = 1$  and the function  $h_j$  is the identity map, then the causal variable  $\text{pa}(\hat{\mathbf{Z}}_{A_j})$  is said to be *measured directly*. ♣

**Remark 2.1** (Difference from (Silva et al., 2006)). While we borrow the concept of a measurement model from Silva et al. (2006), our framework differs in two key aspects. First, Silva et al. (2006) aims to uncover relationships among latent causal variables by searching for pure measurements, i.e., a tree-structure in which latent nodes have fixed, noisy, low-dimensional observed children (measurements). In contrast, we interpret a given causal representation produced by a CRL algorithm as measurement variables and focus on evaluating their usefulness for specific causal tasks, which requires specification of a causal model. Second, Silva et al. (2006) assumes a linear latent structural causal model, whereas our framework imposes no parametric structural assumption on the latent causal variables. Rather, we specify the relationship between the causal variables and their measurements according to certain hypotheses, such as identification guarantees, prior knowledge, or assumptions for specific causal downstream tasks. As we will see in § 3, this also allows us to properly evaluate a learned CRL model. ♠

**Remark 2.2.** While we treat the measurement variables  $\hat{\mathbf{Z}}$  as noise-free nonlinear mixing of their causal parents, we can easily extend our framework to noisy measurements by considering the noise variables as additional latent causal variables. ♠

**Example 2.1.** Assume by the identifiability theory of a specific CRL method that each  $\hat{\mathbf{Z}}_{A_j}$  block-identifies (see Defn. B.1 (von Kügelgen et al., 2021, Defn 4.1)) a subset of latent variables  $\mathbf{Z}_{S_i}$  ( $S_i \subseteq [N]$ ). Then for the measurement model  $\mathcal{M} = \langle \mathbf{Z}, \hat{\mathbf{Z}}, \{h_j\}_{j=1}^M \rangle$  it holds that:  $\hat{\mathbf{Z}}_{A_j} := h_j(\mathbf{Z}_{S_i})$ , with  $h_j : \mathbb{R}^{|S_i|} \rightarrow \mathbb{R}^{D_j}$  a diffeomorphism for all  $j \in [M]$ .

The measurement model induces a partial directed acyclic graph (DAG), that is, for any latent variable  $q$  that is block-identified (Defn. B.1) by  $A_j$ , there is an edge from the latent causal variable  $\mathbf{Z}_q$  to the measurement variable  $\hat{\mathbf{Z}}_{A_j}$ , and the measurement function  $h_j$  is a diffeomorphism. Illustrative examples are shown in Fig. 1 for different identifiability guarantees. ♦

**Discussion.** Note that a measurement model specified by certain identifiability theory (see Fig. 1) is a necessary but not sufficient condition for drop-in replacement of a variable with its identified counterpart in a causal inference engine (Pearl and Mackenzie, 2018) or a downstream causal estimand like *average treatment effect* (Robins et al., 1994). To this end, we introduce *causally valid measurement model*.

**Definition 2.2** (Causally valid measurement model). The measurement model (Defn. 2.1) is “*causally valid*” with respect to a statistical estimand  $g$  that identifies a target causal estimand, if the measurement  $\hat{\mathbf{Z}}$  is a drop-in replacement in  $g$  for the true causal variables  $\mathbf{Z}$ , i.e.,  $g(\mathbf{Z}) = g(\hat{\mathbf{Z}})$ . ♣

**Discussion.** Causal validity of a measurement model with respect to a specific estimand boils down to the estimand being invariant with respect to the measurement function. As (von Kügelgen et al., 2024) already pointed out, identification of a latent causal variable up to a non-linear parameterization (i.e., block-identifiability (Defn. B.1)) does not allow average treatment effect estimation if either the treatment or outcome is a latent causal variable without additional information. For that, a direct measurement (see Defn. 2.1) as in (Cadei et al., 2024, 2025) is necessary;

alternatively, one can choose an estimand that is invariant to non-linear invertible parameterizations, e.g., (conditional) mutual information (Janzing et al., 2013). As another example, a non-linear invertible parameterization is enough to model confounding variables (Yao et al., 2024a) and instruments, see F for extended discussions and examples. Finally, note that the causal validity of the measurement models does not always require one-to-one correspondence between the measurement variables and latent causal variables: When an estimand concerns a coarse-graining of a subset of variables, then a measurement model mixing the right subset of variables can still be causally valid. For example, the valid adjustment set  $\mathbf{W}$  in Fig. 11 can contain two or more variables, which can remain entangled with each other in the learned representation  $\widehat{\mathbf{W}} := h(\mathbf{W})$  as long as the measurement function  $h$  is invertible, see App. F for detailed derivations.

**When is a measurement model “true”?** Note that any causal model between learned representation can always be trivially formulated as a measurement model, with each identified representation variable corresponding to a latent causal variable (i.e.,  $\widehat{\mathbf{Z}}_1 \rightarrow \widehat{\mathbf{Z}}_2$  implicitly implies a measurement model  $\widehat{\mathbf{Z}}_1 \leftarrow \mathbf{Z}_1 \rightarrow \mathbf{Z}_2 \rightarrow \widehat{\mathbf{Z}}_2$ ). Sometimes, by means of other assumptions, the latent causal model may not match one-to-one with the measurements; for example, see Fig. 1 (b). Our discussion on the measurement model only specifies the dependency between a learned representation and an (implicitly) assumed latent causal model. Following (Peters et al., 2014), we intend the latent causal model to be true if it agrees with the results of randomized studies in practice. If the latent causal model is true, then a causally valid measurement model is trivially also true.

### 3 Evaluating Causal Representations using Measurement Models

This section explains how the measurement model formalism we introduced in § 2 serves as a natural tool to evaluate causal representations. A causal representation is defined as a set of measurement variables output from an encoder — a parameterized function that maps the observables  $\mathbf{X}$  to the measurement variables  $\widehat{\mathbf{Z}}$ . Each CRL method specifies a measurement model, either through its identifiability guarantees or the particular causal task it addresses. This measurement model defines which causal variables a representation should *exclusively measure*. Given paired samples of the true causal variables  $\mathbf{Z}$  and their corresponding measurement variables  $\widehat{\mathbf{Z}}$  from a trained CRL model, evaluation boils down to comparing the measurement model against the observed joint distribution  $P_{\mathbf{Z}, \widehat{\mathbf{Z}}}$ . Before presenting our proposed evaluation metric, we introduce the following additional notation.

**Additional notation.** Let  $\mathbf{Z}_1$ ,  $\mathbf{Z}_2$ , and  $\mathbf{Z}_3$  be three absolutely continuous random variables taking values in  $\mathbb{R}^{d_{Z_1}}$ ,  $\mathbb{R}^{d_{Z_2}}$ , and  $\mathbb{R}^{d_{Z_3}}$  respectively. We say that  $\mathbf{Z}_1$  and  $\mathbf{Z}_2$  are *conditionally independent* given  $\mathbf{Z}_3$  if  $p(\mathbf{Z}_1, \mathbf{Z}_2 | \mathbf{Z}_3) = p(\mathbf{Z}_1 | \mathbf{Z}_3)p(\mathbf{Z}_2 | \mathbf{Z}_3)$ , and it is denoted as  $\mathbf{Z}_1 \perp\!\!\!\perp \mathbf{Z}_2 | \mathbf{Z}_3$ . A statistical test  $\varphi$  is a function that maps data to  $\{0, 1\}$ , e.g.,  $\varphi : \mathbb{R}^{n \times d_{Z_1}} \times \mathbb{R}^{n \times d_{Z_2}} \times \mathbb{R}^{n \times d_{Z_3}} \rightarrow \{0, 1\}$ , where  $n$  denotes the number of samples. The test  $\varphi$  rejects a null hypothesis  $\mathcal{H}_0$  if  $\varphi(\mathbf{Z}_1, \mathbf{Z}_2, \mathbf{Z}_3) = 1$  and does not reject it if  $\varphi(\mathbf{Z}_1, \mathbf{Z}_2, \mathbf{Z}_3) = 0$ . Given a significance level  $\alpha \in (0, 1)$ , a test is said to be *valid* if it holds that  $\sup_{P \in \mathcal{H}_0} \mathbb{P}(\varphi(\mathbf{Z}_1, \mathbf{Z}_2, \mathbf{Z}_3) = 1) \leq \alpha$ , and it is said to have power  $\beta \in (0, 1)$  against an alternative distribution  $P \notin \mathcal{H}_0$  if  $\mathbb{P}(\varphi(\mathbf{Z}_1, \mathbf{Z}_2, \mathbf{Z}_3) = 1) = \beta$ .

**Exclusivity of measurements.** A measurement model describes the relationship between the causal and the measurement variables. Specifically, it tell us for each measurement variable, which causal variables it should *exclusively measure*. We formally define this concept below.

**Definition 3.1** (Exclusivity of a measurement variable). Let  $\mathcal{M} = \langle \mathbf{Z}, \widehat{\mathbf{Z}}, \{h_j\}_{j \in [M]} \rangle$  be a measurement model, if a measurement variable  $\widehat{\mathbf{Z}}_{A_j}$ ,  $j \in [M]$  only has one causal parent  $\mathbf{Z}_i$  for some  $i \in [N]$ , then we say  $\widehat{\mathbf{Z}}_{A_j}$  *exclusively measures*  $\mathbf{Z}_i$ . ♣

Given samples of the causal and measurement variables  $\{(\mathbf{z}^k, \widehat{\mathbf{z}}^k)\}_{k \in [n]}$ , we can check whether the measurement variables do satisfy the exclusivity property in the data by testing the following null hypotheses:

$$\mathcal{H}_0(i, j) : \widehat{\mathbf{Z}}_{A_j} \perp\!\!\!\perp \mathbf{Z}_i | \mathbf{Z}_{[N] \setminus \{i\}}, \quad (3.1)$$

for all  $i \in [N]$  and  $j \in [M]$ . For a numerical summary of the overall exclusivity of the measurement variables, we propose the following *Test-based Measurement EXclusivity (T-MEX)* score.

**Definition 3.2** (Test-based measurement exclusivity score). Let  $V \in \{0, 1\}^{N \times M}$  be the adjacency matrix corresponding to the conditional independencies according to a measurement model  $\mathcal{M}$ , such

that for all  $j \in [M]$  and  $i \in [N]$ ,  $V_{ji} = 1$  if a causal variable  $\mathbf{Z}_i$  is a causal parent of a measurement variable  $\widehat{\mathbf{Z}}_{A_j}$  according to the measurement model, and  $V_{ji} = 0$  otherwise. Let  $\widehat{W} \in \{0, 1\}^{N \times M}$  be the matrix constructed according to the test results of the conditional independencies in eq. (3.1) based on the samples of  $(\mathbf{Z}, \widehat{\mathbf{Z}})$ , such that for all  $j \in [M]$  and  $i \in [N]$ ,  $W_{ji} = 1$  if  $\mathcal{H}_0(i, j)$  is rejected, and  $W_{ji} = 0$  otherwise. Then the test-based measurement exclusivity (T-MEX) score is defined as the *hamming distance* between  $V$  and  $\widehat{W}$ :

$$\text{T-MEX}(V, \widehat{W}) := \sum_{j=1}^M \sum_{i=1}^N \mathbb{1}(V_{ji} \neq \widehat{W}_{ji}),$$

where  $\mathbb{1}$  denotes the indicator function. ♣

Details for computing T-MEX is given in Alg. 1. As T-MEX score is based on conditional independence testing, its value depends on the randomness in the samples, and the properties of the statistical tests being used. In Prop. 3.1, we show the upper bound of the expected T-MEX score when the joint distribution  $P_{\mathbf{Z}, \widehat{\mathbf{Z}}}$  of the causal variables  $\mathbf{Z}$  and output measurement variables  $\widehat{\mathbf{Z}}$  from a CRL model does align with a measurement model.

**Proposition 3.1.** *Let  $\{\varphi_{ij}\}_{i \in [N], j \in [M]}$  be a family of tests for eq. (3.1) where for all  $i \in [N]$  and  $j \in [M]$ ,  $\varphi_{ij}$  is valid with level  $\alpha \in (0, 1)$  and has power at least  $\beta \in (0, 1)$ . Given an adjacency matrix  $V \in \mathbb{R}^{N \times M}$  based on a measurement model, if the joint distribution  $P_{\mathbf{Z}, \widehat{\mathbf{Z}}}$  of the causal and measurement variables does align with the measurement model, and each entry in  $\widehat{W}$  is computed based on an independent set of samples  $\{(\mathbf{z}^k, \widehat{\mathbf{z}}^k)\}_{k \in [n_{ij}]}$ ,  $n_{ij} \in \mathbb{N}_+$ , then the expected T-MEX satisfies*

$$\mathbb{E}[\text{T-MEX}(V, \widehat{W})] \leq \alpha \cdot (MN - \|V\|_1) + (1 - \beta) \cdot \|V\|_1,$$

where  $\|V\|_1 = \sum_{i=1}^N \sum_{j=1}^M V_{ij}$  is the  $L_1$ -norm of  $V$ .

**Remark 3.1.** Prop. 3.1 assumes that each null hypothesis in eq. (3.1) is tested using an independent set of samples. When there is only one set of samples available for a large number of tests, using the same sample set can lead to inflation of the false positive rate, and may inflate the T-MEX score. In this case, we recommend doing a multiple comparison adjustment when constructing  $\widehat{W}$ , for example, the Bonferroni-Holm correction (Holm, 1979), which controls the family-wise error rate while it does not make assumptions on the dependencies of the multiple p-values. ♠

**Remark 3.2.** In this section, we focus on the exclusivity perspective of a measurement model via an approach similar to the idea of falsification of causal graphs (e.g., Kook, 2025; Fallor et al., 2024). This is a non-parametric approach which is agnostic to the measurement functions. In certain cases, however, a measurement model may contain not only the conditional independence structure, but also other parametric assumptions through specifications of the measurement functions  $\{h_j\}_{j \in [M]}$ . Then, one may extend T-MEX to also take these constraints into account. ♠

## 4 Related Work: Flaws of Existing Evaluation Metrics for CRL

In this section, we cover the metrics that have been used by most papers proposing causal representation learning approaches (von Kügelgen et al., 2021, 2024; Zheng et al., 2022; Ahuja et al., 2024, 2022; Varici et al., 2024; Zhang et al., 2024a,b; Yao et al., 2024b; Lippe et al., 2022a,b; Lachapelle et al., 2022, 2023; Yao et al., 2022; Zhang et al., 2024a; Squires et al., 2023; Buchholz et al., 2024; Yao et al., 2025) to name a few. We highlight how these metrics are not immediately suitable to evaluate identification results in the presence of causal relations, making it difficult to compare models and requiring great care in the interpretation of the results that is often missed (Gamella et al., 2025).

Standard evaluation for latent variable identification in existing CRL works employs *coefficient of determination*  $R^2$  (Defn. 4.1), and *mean correlation coefficient* (Defn. 4.2). However, when the latent variables are causally related, a high score of these two metrics does not indicate that the learned representations align with the measurement model we expect from the identifiability theory. Example 4.1 illustrates this limitation of these two metrics under the presence of causal dependencies.

**Example 4.1.** Assume that the latent causal variables  $\mathbf{Z}$  in Fig. 1 (b) follow a linear Gaussian additive noise model. Specifically, the latent variables  $\mathbf{Z}_1$  and  $\mathbf{Z}_2$  are generated based on the following structural equation:

$$\mathbf{Z}_2 := a \cdot \mathbf{Z}_1 + e \tag{4.1}$$



with  $e \sim P_e$ ,  $\mathbb{E}[e] = 0$  and  $e \perp\!\!\!\perp \mathbf{Z}_1$ . Suppose that the measurement model which induces Fig. 1 (b) specifies that the measurement function  $h : \mathbb{R} \rightarrow \mathbb{R}$  is a diffeomorphism such that  $\hat{\mathbf{Z}}_{A_1} = h(\mathbf{Z}_1)$ , that is,  $\hat{\mathbf{Z}}_{A_1}$  identifies  $\mathbf{Z}_1$ , while  $\hat{\mathbf{Z}}_{A_1}$  should not contain any additional information about  $\mathbf{Z}_2$ . ♦

**Coefficient of determination.**  $R^2$  measures the proportion of the variation in the dependent variables explained by the regression model (Draper and Smith, 1998), formally defined as

**Definition 4.1** (Population  $R^2$  score). Let  $(\mathbf{Z}_i, \hat{\mathbf{Z}}_{A_j})$  be a pair of random variables both taking values in  $\mathbb{R}$ ,  $i \in [N], j \in [M]$ . The coefficient of determination  $R^2$  score for predicting  $\mathbf{Z}_i$  from  $\hat{\mathbf{Z}}_{A_j}$  is defined as

$$R^2(\mathbf{Z}_i, \hat{\mathbf{Z}}_{A_j}) := \frac{\mathbb{V}(\mathbb{E}[\mathbf{Z}_i | \hat{\mathbf{Z}}_{A_j}])}{\mathbb{V}(\mathbf{Z}_i)},$$

where  $\mathbb{E}$  and  $\mathbb{V}$  denote the expectation and variance operators, respectively. ♣

**Problem of  $R^2$  in Example 4.1:** Let  $R^2(\mathbf{Z}_1, \hat{\mathbf{Z}}_{A_1})$  denote the  $R^2$  score as defined in Defn. 4.1. Following the linear mechanism in eq. (4.1),  $R^2(\mathbf{Z}_2, \hat{\mathbf{Z}}_{A_1})$  can be expressed as

$$\begin{aligned} R^2(\mathbf{Z}_2, \hat{\mathbf{Z}}_{A_1}) &= \frac{\mathbb{V}(\mathbb{E}[\mathbf{Z}_2 | \hat{\mathbf{Z}}_{A_1}])}{\mathbb{V}(\mathbf{Z}_2)} = \frac{\mathbb{V}(\mathbb{E}[a\mathbf{Z}_1 + e | \hat{\mathbf{Z}}_{A_1}])}{\mathbb{V}(a\mathbf{Z}_1 + e)} \\ &= \frac{a^2\mathbb{V}(\mathbb{E}[\mathbf{Z}_1 | \hat{\mathbf{Z}}_{A_1}])}{a^2\mathbb{V}(\mathbf{Z}_1) + \mathbb{V}(e)} = \frac{a^2\mathbb{V}(\mathbf{Z}_1)}{a^2\mathbb{V}(\mathbf{Z}_1) + \mathbb{V}(e)} R^2(\mathbf{Z}_1, \hat{\mathbf{Z}}_{A_1}). \end{aligned} \quad (4.2)$$

Depending on the noise level  $\mathbb{V}(e)$ ,  $R^2(\mathbf{Z}_2, \hat{\mathbf{Z}}_{A_1})$  can be either close to  $R^2(\mathbf{Z}_1, \hat{\mathbf{Z}}_{A_1})$  when  $\mathbb{V}(e) \ll a^2\mathbb{V}(\mathbf{Z}_1)$  or close to 0 when  $\mathbb{V}(e)$  is significantly higher than  $a^2\mathbb{V}(\mathbf{Z}_1)$ ; in either case it does not reflect whether  $\hat{\mathbf{Z}}_{A_1}$  identifies  $\mathbf{Z}_2$  or not, in the sense of Defn. B.1. Ultimately,  $R^2$  is a metric for predictability, not for identifiability. Using it as an identifiability metric under causal dependency can lead to misinterpretation (Gamella et al., 2025).

**Remark 4.1** (Other problems of  $R^2$  score).  $R^2$  is designed to measure how well a linear model fits between two random variables. When the fitted model is nonlinear,  $R^2$  can yield values outside  $[0, 1]$ , which can be misleading. See also Cameron and Windmeijer (1997) for more details. ♠

**Mean correlation coefficient (MCC).** Intuitively, MCC measures the *component-wise correspondence* between the learned representation  $\hat{\mathbf{Z}}$  and the ground truth latent variables  $\mathbf{Z}$ . When using MCC, it is required to have the same latent and encoding dimensions. We restate the definition of the MCC as follows.

**Definition 4.2** (Mean correlation coefficient).

$$\text{MCC} = \frac{1}{N} \max_{\pi \in \text{perm}[N]} \sum_{i=1}^N |\text{Corr}(\mathbf{Z}_i, \hat{\mathbf{Z}}_{\pi(i)})|,$$

where  $\text{Corr}(\cdot, \cdot)$  refers to the Pearson correlation under linear relationship and Spearman correlation in the nonlinear case. ♣

However, we notice that MCC cannot capture how well the representations are *disentangled*, misaligning with its original purpose of measuring *component-wise correspondence*. Assume in Fig. 1 (b) that  $\hat{\mathbf{Z}}_{A_1} = \hat{\mathbf{Z}}_1$  and  $\hat{\mathbf{Z}}_{A_2} = [\hat{\mathbf{Z}}_2, \hat{\mathbf{Z}}_3]$ . The learned representations  $\hat{\mathbf{Z}}_{A_j}$  are linear mappings of their causal parents  $\mathbf{Z}_{\text{pa}(\hat{\mathbf{Z}}_{A_j})}$ :

$$\hat{\mathbf{Z}}_1 = s \cdot \mathbf{Z}_1; \quad \hat{\mathbf{Z}}_2 = a \cdot \mathbf{Z}_2 + b \cdot \mathbf{Z}_3; \quad \hat{\mathbf{Z}}_3 = c \cdot \mathbf{Z}_2 + d \cdot \mathbf{Z}_3,$$

where  $s, a, b, c, d \neq 0$ . In this case, the MCC would obtain the highest value 1 although  $\mathbf{Z}_2, \mathbf{Z}_3$  are still entangled in the learned representation  $\hat{\mathbf{Z}}$ , demonstrating that MCC is inadequate in evaluating element-wise identification under causal relations.

**Evaluation of causal relations.** Causal relations are usually evaluated with the standard metrics *Structural Hamming distance* (SHD). We remark that evaluating causal discovery on the learned representations should always be done in conjunction with latent variable identification, as it is possible

to achieve a perfect SHD (i.e., zero) with entangled representations, using e.g., LiNGAM (Shimizu et al., 2006), as shown numerically in App. D.3.

**Evaluation of disentangled representation.** Evaluating disentangled representations (where the ground truth latent variables are assumed to be mutually independent) is comparatively easier. In the disentangled case, the main objective is to assess how well the learned representation aligns one-to-one with the ground truth latents. Commonly used evaluation metrics for disentangled representations include the BetaVAE Score (Higgins et al., 2017), FactorVAE Score (Kim and Mnih, 2018), Mutual Information Gap (MIG Chen et al. (2018)), DCI-disentanglement (Eastwood and Williams, 2018), Modularity (Ridgeway and Mozer, 2018) and SAP (Kumar et al., 2017). Broadly, evaluating learned representations can be viewed as a two-stage procedure, first estimating the relationship between latent variables and representations, and then aggregating this information into a single score (Locatello et al., 2020). In some way, our test can be seen as following the same strategy, although evaluating variable-level correspondence is less straightforward given underlying causal relationships, making it a fundamentally more challenging and under-studied problem.

## 5 Experiments

This section demonstrates the validity of the proposed T-MEX score in various causal reasoning settings. We first focus on *covariate adjustment* in numerical simulations, using T-MEX to evaluate both identifiability (Defn. B.1) and causal validity (Defn. 2.2) of the representations (§ 5.1). Next, we move on to *treatment effect estimation* in high-dimensional ecological video analysis, where we demonstrate that T-MEX effectively characterizes how well the learned representation supports answering downstream causal questions (§ 5.2). For both experiments, we estimate T-MEX based on the projected covariance measure (PCM) test (Lundborg et al., 2024) implemented in the python package pycomets (Huang and Kook, 2025), which is an algorithm-agnostic test for conditional independence (see App. E for more explanations). Further experiment details and additional results are deferred to App. D.

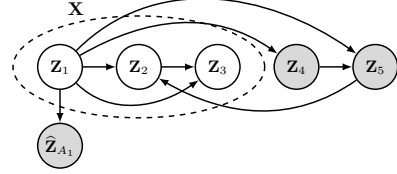

Figure 2: Measurement model containing the *latent* causal variables  $Z_1$ ,  $Z_2$ , and  $Z_3$  (white nodes) and *observed* (also termed “*directly measured*” in Defn. 2.1) causal variables  $Z_4$  and  $Z_5$  (gray nodes). The entangled observable  $X$  is shown as a dashed oval.  $\hat{Z}_{A_1}$  denotes the exclusive measurement (Defn. 3.1) of  $Z_1$ .

### 5.1 Numerical Simulation

This experiment validates our proposed T-MEX evaluation metric through a controlled numerical simulation. We leverage CRL to model confounders and perform backdoor adjustment to estimate the average treatment effect (ATE). We report both  $R^2$  and the ATE bias, demonstrating that T-MEX closely tracks the ATE bias and provides a reliable measure of representation quality, whereas  $R^2$  fails to yield consistent or meaningful conclusions.

**Experiment settings.** We generate five causal variables,  $Z_i$  for  $i \in [5]$  according to a linear structural causal model (see App. D.1), where two of the causal variables,  $Z_4$  and  $Z_5$ , are *observed* (also termed “*directly measured*” in Defn. 2.1). The entangled observations  $X := f(Z_1, Z_2, Z_3)$  are generated by applying a diffeomorphism  $f : \mathbb{R}^3 \rightarrow \mathbb{R}^3$ , implemented as an invertible MLP, on the causal variables. Our *target causal task* is to estimate the ATE of  $Z_4$  on  $Z_5$ . As the true causal relationship between  $Z_4$  and  $Z_5$  is linear, we can construct a consistent causal estimator where  $Z_1$  is adjusted using linear regression, which is invariant up to *bijective transformations* of  $Z_1$  (App. F). Although  $Z_1$  is latent and cannot be directly adjusted for, one can *measure* it through a bijective transformation  $\hat{Z}_{A_1} := h(Z_1)$  which is obtained from the entangled observation  $X$ . Note that in this case,  $\hat{Z}_{A_1}$  *exclusively measures* (Defn. 3.1) the confounder  $Z_1$ , as depicted in Fig. 2. We train three different CRL models based on the identifiable learning algorithm proposed by Yao et al. (2024b) and obtain samples of the measurement variable  $\hat{Z}_{A_1}$ :

- **Model A:** a sufficiently trained model from which we expect the learned representation  $\hat{Z}_{A_1}^A$  (where by a slight abuse of notation, the superscript represents the model indicator) to *exclusively measure*  $Z_1$ ;

- **Model B:** an insufficiently trained model with unclear latent-measurement correspondence;
- **Model C:** a corrupted version of Model A where the representation  $\hat{\mathbf{Z}}_{A_1}^C$  is defined as a linear mixing of the identified representation  $\hat{\mathbf{Z}}_{A_1}^A$  and  $\mathbf{Z}_2, \mathbf{Z}_3$ .

**Results.** Tab. 1 summarizes the T-MEX scores together with the coefficient of determination  $R^2$  for all three models A, B and C, presented as  $\text{mean} \pm \text{sd}$ . For statistical validity, we compute the results using 50 simulated datasets from each model, with each dataset containing 4096 observations. Further details about the test results are provided in App. D.1. Tab. 1 shows that a sufficiently trained model (Model A) achieves a low T-MEX score, indicating that the learned representation  $\hat{\mathbf{Z}}_{A_1}$  exclusively measures the latent variable  $\mathbf{Z}_1$ . In contrast, the insufficiently trained and corrupted models (Models B and C) exhibit high T-MEX scores, demonstrating misalignment between the learned representation and the hypothesized measurement model (Fig. 2). Fig. 3 presents the ATE bias estimated from the learned representations of all three models. We observe a strong correlation between T-MEX and the absolute bias of the ATE, validating T-MEX as a reliable indicator of the causal validity of the learned representation (Defn. 2.2), whereas  $R^2$  fails to show a clear correspondence with the ATE bias because  $R^2$  was relatively high for all three latent variables as shown in Tab. 1.

Table 1: T-MEX and  $R^2$  scores of the learned representations (presented as  $\text{mean} \pm \text{std}$ ) of **model A** (sufficiently trained, i.e.,  $\hat{\mathbf{Z}}_1$  exclusively measures  $\mathbf{Z}_1$ ), **model B** (insufficiently trained model with unclear latent-measurement correspondence) and **model C** (manually corrupted representation by linearly mixing  $\mathbf{Z}_2, \mathbf{Z}_3$  with the representation of model A) based on 50 simulated datasets, where each dataset contains 4096 observations.

| Model | T-MEX ( $\downarrow$ ) | $R^2$               |                     |                     |
|-------|------------------------|---------------------|---------------------|---------------------|
|       |                        | $\mathbf{Z}_1$      | $\mathbf{Z}_2$      | $\mathbf{Z}_3$      |
| A     | $0.1200 \pm 0.3283$    | $0.9984 \pm 0.0001$ | $0.7516 \pm 0.0064$ | $0.8001 \pm 0.0006$ |
| B     | $1.1800 \pm 0.3881$    | $0.6665 \pm 0.0078$ | $0.8305 \pm 0.0032$ | $0.8707 \pm 0.0027$ |
| C     | $2.0000 \pm 0.0000$    | $0.9394 \pm 0.0016$ | $0.5421 \pm 0.0096$ | $0.6627 \pm 0.0084$ |

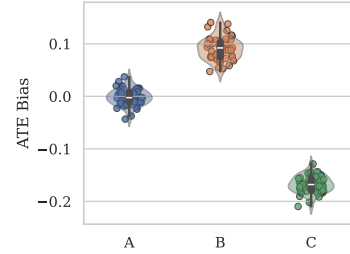

Figure 3: T-MEX tracks the absolute bias of the ATE estimates of  $\mathbf{Z}_4$  on  $\mathbf{Z}_5$  where  $\hat{\mathbf{Z}}_1$  is conditioned on as the back door adjustment.

## 5.2 Real-world Ecological Experiment: ISTAnt

This experiment validates the T-MEX score on ISTAnt (Cadei et al., 2024), a real-world ecological benchmark designed for treatment effect estimation. We show a strong correlation between T-MEX and the absolute bias of the ATE, demonstrating that T-MEX can reliably evaluate the causal validity of learned representations under the challenge of high-dimensional real-world data.

**Experiment settings.** ISTAnt consists of video recordings of ant triplets with occasional grooming behavior. The goal is to extract a per-frame representation for supervised behavior classification (grooming or not) to estimate the ATE of an intervention (exposure to a certain pathogen). Retrieving causally valid representations in this case is challenging as we have more non-annotated than annotated data, as described by (Cadei et al., 2024).

Fig. 4 depicts the hypothesized measurement model for this particular causal task, note that the treatment  $\mathbf{T}$  and outcome  $\mathbf{Y}$  are unconfounded because the data is collected through a randomized controlled trial (RCT), meaning that the binary treatment  $\mathbf{T}$  is randomly assigned.

**Results.** We compute the T-MEX score for 2,400 different models at a significance level of  $\alpha = 0.05$ , and compare both classification accuracy and ATE bias against T-MEX. A full description of the considered models and training details is reported in App. D.2. We only focus on the models that yield an accuracy over 80% for meaningful statements. We observe that models with T-MEX = 0 achieve higher mean and lower variance for both accuracy and ATE bias, demonstrating

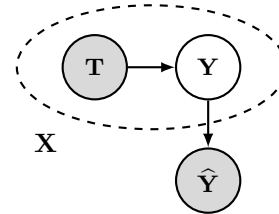

Figure 4: Measurement Model for the causal task in ISTAnt.  $\mathbf{T}$  denotes the treatment (chemical exposure) and the latent outcome  $\mathbf{Y}$  represents the ant’s grooming behavior. Observable  $\mathbf{X}$  (video recordings) is represented using a dashed oval. The measurement  $\hat{\mathbf{Y}}$  exclusively measures (Defn. 3.1)  $\mathbf{Y}$ .



that T-MEX effectively and reliably evaluates the quality of learned representations in terms of both classification performance and causal validity (Defn. 2.2).

**Statistical validation.** To further assess the statistical significance between the T-MEX = 0 and T-MEX = 1 groups, we conduct a Mann-Whitney U test (Mann and Whitney, 1947) with the null hypothesis

$$\mathcal{H}_0 : \mathbb{E}[|\text{ATE Bias}| \mid \text{T-MEX} = 1] \leq \mathbb{E}[|\text{ATE Bias}| \mid \text{T-MEX} = 0].$$

The resulting p-value of 0.0047 leads us to rejecting  $\mathcal{H}_0$ , providing strong evidence that the average absolute bias of the ATE for models with T-MEX = 1 is significantly higher than for those with T-MEX = 0. Overall, T-MEX shows a strong correlation with absolute bias of the ATE, validating its reliability as an evaluation metric for the causal validity of learned representations (Defn. 2.2).

**Real-world implications of T-MEX.** We emphasize that the proposed T-MEX score can be computed using only observational data, possibly with selection bias, as long as this selection bias does not change the conditional independence between measurements and causal variables. Instead, calculating the ATE bias as in (Cadei et al., 2024) requires a validation set that closely approximates the underlying population of the randomized controlled trial, a significantly stronger assumption that is often difficult to satisfy in real-world settings. Overall, T-MEX offers a convenient and accessible evaluation metric that reliably quantifies the usefulness of the learned representation for a causal downstream task, without the need for additional identifying assumptions.

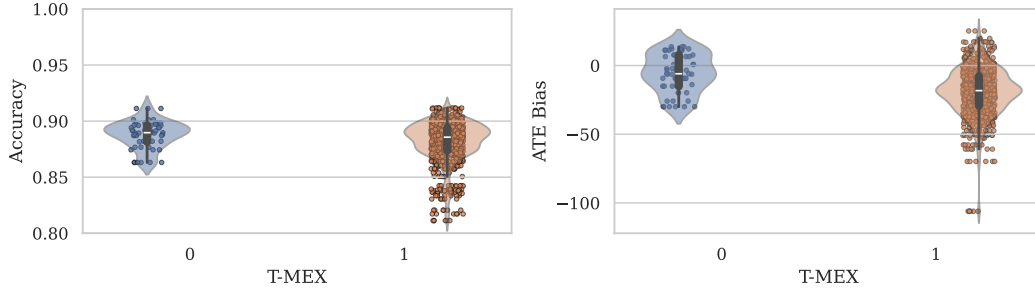

Figure 5: *T-MEX reflects model performance in terms of both classification accuracy and causal validity (Defn. 2.2). Compared to their counterparts, models with lower T-MEX achieve consistently high accuracy (Left) and center their ATE bias near zero with reduced variance (Right).*

## 6 Conclusion and Limitations

This paper introduces a novel perspective on Causal Representation Learning (CRL) based on a measurement model framework, in which causal representations are treated as proxy measurements of latent causal variables (§ 2). This perspective provides a flexible framework that unites CRL identification theory with downstream task assumptions via measurement functions, yielding a principled way to evaluate representation quality. More specifically, we propose a new evaluation metric, Test-based Measurement EXclusivity (T-MEX) score, which quantifies the discrepancy between a given measurement model (specified by a CRL algorithm, a causal task, or ground truth knowledge) and the joint distribution of causal and measurement variables (representation outputs of a CRL model) using conditional independence tests (§ 3). Because these conditional independence tests impose no parametric assumptions, our T-MEX score remains broadly applicable. However, like any statistical procedure, these tests are subject to sampling variability and potential statistical errors, so the reliability of T-MEX depends on which test is chosen. By remaining agnostic about the specific test, we empower practitioners to tailor the score to whatever assumptions they are willing to make (e.g., parametric or non-parametric). We demonstrate, using both simulations (§ 5.1) and real-world video analysis (§ 5.2), that our proposed T-MEX score effectively quantifies the identification and causal validity of the learned representation (Defn. 2.2). This provides a convenient and practical evaluation scheme for representation quality in real-world scenarios, especially when the true treatment effect bias is unavailable, such as in the absence of randomized studies.

## References

- K. Ahuja, E. Caballero, D. Zhang, J.-C. Gagnon-Audet, Y. Bengio, I. Mitliagkas, and I. Rish. Invariance principle meets information bottleneck for out-of-distribution generalization. *Advances in Neural Information Processing Systems*, 34:3438–3450, 2021.
- K. Ahuja, J. S. Hartford, and Y. Bengio. Weakly supervised representation learning with sparse perturbations. *Advances in Neural Information Processing Systems*, 35:15516–15528, 2022.
- K. Ahuja, A. Mansouri, and Y. Wang. Multi-domain causal representation learning via weak distributional invariances. In *International Conference on Artificial Intelligence and Statistics*, pages 865–873. PMLR, 2024.
- C. Ai, L.-H. Sun, Z. Zhang, and L. Zhu. Testing unconditional and conditional independence via mutual information. *Journal of Econometrics*, 240(2):105335, 2024.
- M. Arjovsky, L. Bottou, I. Gulrajani, and D. Lopez-Paz. Invariant risk minimization, 2020.
- E. Bareinboim and J. Pearl. Causal inference and the data-fusion problem. *Proceedings of the National Academy of Sciences*, 113(27):7345–7352, 2016.
- P. Billingsley. *Probability and Measure*. Wiley Series in Probability and Statistics. John Wiley & Sons, Hoboken, NJ, 4th edition, 2008.
- S. Buchholz, G. Rajendran, E. Rosenfeld, B. Aragam, B. Schölkopf, and P. Ravikumar. Learning linear causal representations from interventions under general nonlinear mixing. *Advances in Neural Information Processing Systems*, 36, 2024.
- R. Cadei, L. Lindorfer, S. Cremer, C. Schmid, and F. Locatello. Smoke and mirrors in causal downstream tasks. *Advances in Neural Information Processing Systems*, 37, 2024.
- R. Cadei, I. Demirel, P. De Bartolomeis, L. Lindorfer, S. Cremer, C. Schmid, and F. Locatello. Causal lifting of neural representations: Zero-shot generalization for causal inferences. *arXiv preprint arXiv:2502.06343*, 2025.
- A. C. Cameron and F. A. Windmeijer. An R-squared measure of goodness of fit for some common nonlinear regression models. *Journal of econometrics*, 77(2):329–342, 1997.
- G. Casella and R. Berger. *Statistical inference*. CRC Press, 2024.
- R. T. Chen, X. Li, R. B. Grosse, and D. K. Duvenaud. Isolating sources of disentanglement in variational autoencoders. *Advances in neural information processing systems*, 31, 2018.
- V. Chernozhukov, D. Chetverikov, M. Demirer, E. Duflo, C. Hansen, W. Newey, and J. Robins. Double/debiased machine learning for treatment and structural parameters. *The Econometrics Journal*, 21(1):C1–C68, 2018.
- X. Dong, B. Huang, I. Ng, X. Song, Y. Zheng, S. Jin, R. Legaspi, P. Spirtes, and K. Zhang. A versatile causal discovery framework to allow causally-related hidden variables. In *The Twelfth International Conference on Learning Representations*, 2024.
- N. R. Draper and H. Smith. *Applied regression analysis*, volume 326. John Wiley & Sons, 1998.
- C. Eastwood and C. K. Williams. A framework for the quantitative evaluation of disentangled representations. In *6th International Conference on Learning Representations*, 2018.
- P. M. Faller, L. C. Vankadara, A. A. Mastakouri, F. Locatello, and D. Janzing. Self-compatibility: Evaluating causal discovery without ground truth. In *International Conference on Artificial Intelligence and Statistics*, pages 4132–4140. PMLR, 2024.
- T. Fernández and N. Rivera. A general framework for the analysis of kernel-based tests. *Journal of Machine Learning Research*, 25(95):1–40, 2024.
- M. Fumero, F. Wenzel, L. Zancato, A. Achille, E. Rodolà, S. Soatto, B. Schölkopf, and F. Locatello. Leveraging sparse and shared feature activations for disentangled representation learning. *Advances in Neural Information Processing Systems*, 36, 2024.

444 J. L. Gamella, S. Bing, and J. Runge. Sanity checking causal representation learning on a simple  
445 real-world system. *arXiv preprint arXiv:2502.20099*, 2025.

446 I. Higgins, L. Matthey, A. Pal, C. Burgess, X. Glorot, M. Botvinick, S. Mohamed, and A. Lerchner.  
447 beta-VAE: Learning basic visual concepts with a constrained variational framework. In *International  
448 conference on learning representations*, 2017.

449 S. Holm. A simple sequentially rejective multiple test procedure. *Scandinavian journal of statistics*,  
450 pages 65–70, 1979.

451 S. Huang and L. Kook. pycomets. <https://github.com/shimenghuang/pycomets>, 2025. Accessed:  
452 2025-05-15.

453 A. Hyvärinen and P. Pajunen. Nonlinear independent component analysis: Existence and uniqueness  
454 results. *Neural networks*, 12(3):429–439, 1999.

455 A. Hyvarinen, H. Sasaki, and R. Turner. Nonlinear ICA using auxiliary variables and generalized  
456 contrastive learning. In *The 22nd International Conference on Artificial Intelligence and Statistics*,  
457 pages 859–868. PMLR, 2019.

458 M. Jain, A. Denton, S. Whitfield, A. Didolkar, B. Earnshaw, J. Hartford, et al. Automated discovery  
459 of pairwise interactions from unstructured data. *arXiv preprint arXiv:2409.07594*, 2024.

460 D. Janzing, D. Balduzzi, M. Grosse-Wentrup, and B. Schölkopf. Quantifying causal influences. *The  
461 Annals of Statistics*, 41(5):2324–2358, 2013.

462 H. Kim and A. Mnih. Disentangling by factorising. In *International conference on machine learning*,  
463 pages 2649–2658. PMLR, 2018.

464 L. Kong, S. Xie, W. Yao, Y. Zheng, G. Chen, P. Stojanov, V. Akinwande, and K. Zhang. Partial  
465 disentanglement for domain adaptation. In *International Conference on Machine Learning*, pages  
466 11455–11472. PMLR, 2022.

467 L. Kong, B. Huang, F. Xie, E. Xing, Y. Chi, and K. Zhang. Identification of nonlinear latent hierar-  
468 chical models. *arXiv preprint arXiv:2306.07916*, 2023.

469 L. Kook. Falsifying causal models via nonparametric conditional independence testing. In *Proceed-  
470 ings of the 39th International Workshop on Statistical Modelling (IWSM)*, 2025. (to appear).

471 L. Kook and A. R. Lundborg. Algorithm-agnostic significance testing in supervised learning with  
472 multimodal data. *Briefings in Bioinformatics*, 25(6):bbae475, 2024.

473 D. Krueger, E. Caballero, J.-H. Jacobsen, A. Zhang, J. Binas, D. Zhang, R. Le Priol, and A. Courville.  
474 Out-of-distribution generalization via risk extrapolation (rex). In *International conference on  
475 machine learning*, pages 5815–5826. PMLR, 2021.

476 A. Kumar, P. Sattigeri, and A. Balakrishnan. Variational inference of disentangled latent concepts  
477 from unlabeled observations. *arXiv preprint arXiv:1711.00848*, 2017.

478 S. Lachapelle, R. Pau, Y. Sharma, K. E. Everett, R. Le Priol, A. Lacoste, and S. Lacoste-Julien.  
479 Disentanglement via mechanism sparsity regularization: A new principle for nonlinear ICA. In  
480 *First Conference on Causal Learning and Reasoning*, 2022.

481 S. Lachapelle, T. Deleu, D. Mahajan, I. Mitliagkas, Y. Bengio, S. Lacoste-Julien, and Q. Bertrand.  
482 Synergies between disentanglement and sparsity: Generalization and identifiability in multi-task  
483 learning. In *International Conference on Machine Learning*, pages 18171–18206. PMLR, 2023.

484 P. Lippe, S. Magliacane, S. Löwe, Y. M. Asano, T. Cohen, and E. Gavves. Causal representation  
485 learning for instantaneous and temporal effects in interactive systems. In *The Eleventh Interna-  
486 tional Conference on Learning Representations*, 2022a.

487 P. Lippe, S. Magliacane, S. Löwe, Y. M. Asano, T. Cohen, and S. Gavves. Citris: Causal identifi-  
488 ability from temporal intervened sequences. In *International Conference on Machine Learning*,  
489 pages 13557–13603. PMLR, 2022b.

- 490 F. Locatello, S. Bauer, M. Lucic, G. Raetsch, S. Gelly, B. Schölkopf, and O. Bachem. Challenging  
491 common assumptions in the unsupervised learning of disentangled representations. In *International Conference on Machine Learning*, pages 4114–4124. PMLR, 2019.
- 493 F. Locatello, S. Bauer, M. Lucic, G. Rätsch, S. Gelly, B. Schölkopf, and O. Bachem. A sober  
494 look at the unsupervised learning of disentangled representations and their evaluation. *Journal of*  
495 *Machine Learning Research*, 21(209):1–62, 2020.
- 496 A. R. Lundborg, I. Kim, R. D. Shah, and R. J. Samworth. The projected covariance measure for  
497 assumption-lean variable significance testing. *The Annals of Statistics*, 52(6):2851–2878, 2024.
- 498 H. B. Mann and D. R. Whitney. On a test of whether one of two random variables is stochastically  
499 larger than the other. *The Annals of Mathematical Statistics*, pages 50–60, 1947.
- 500 M. Oquab, T. Darcet, T. Moutakanni, H. Vo, M. Szafraniec, V. Khalidov, P. Fernandez, D. Haziza,  
501 F. Massa, A. El-Nouby, et al. Dinov2: Learning robust visual features without supervision. *arXiv*  
502 *preprint arXiv:2304.07193*, 2023.
- 503 J. Pearl and D. Mackenzie. *The book of why: the new science of cause and effect*. Basic books,  
504 2018.
- 505 J. Peters, J. M. Mooij, D. Janzing, and B. Schölkopf. Causal discovery with continuous additive  
506 noise models. *Journal of Machine Learning Research*, 2014.
- 507 J. Peters, D. Janzing, and B. Schölkopf. *Elements of Causal Inference: Foundations and Learning*  
508 *Algorithms*. The MIT Press, 2017. ISBN 0262037319.
- 509 A. Ravuri, K. Ulicna, J. Osea, K. Donhauser, and J. Hartford. Weakly supervised latent variable  
510 inference of proximity bias in crispr gene knockouts from single-cell images. In *Learning Mean-*  
511 *ingful Representations of Life (LMRL) Workshop at ICLR 2025*, 2025.
- 512 K. Ridgeway and M. C. Mozer. Learning deep disentangled embeddings with the F-statistic loss.  
513 *Advances in neural information processing systems*, 31, 2018.
- 514 J. M. Robins, A. Rotnitzky, and L. P. Zhao. Estimation of regression coefficients when some regres-  
515 sors are not always observed. *Journal of the American statistical Association*, 89(427):846–866,  
516 1994.
- 517 M. Rojas-Carulla, B. Schölkopf, R. Turner, and J. Peters. Invariant models for causal transfer learn-  
518 ing. *Journal of Machine Learning Research*, 19(36):1–34, 2018.
- 519 J. Runge. Conditional independence testing based on a nearest-neighbor estimator of conditional  
520 mutual information. In A. Storkey and F. Perez-Cruz, editors, *Proceedings of the Twenty-First*  
521 *International Conference on Artificial Intelligence and Statistics*, volume 84 of *Proceedings of*  
522 *Machine Learning Research*, pages 938–947. PMLR, 09–11 Apr 2018.
- 523 B. Schölkopf, F. Locatello, S. Bauer, N. R. Ke, N. Kalchbrenner, A. Goyal, and Y. Bengio. Toward  
524 causal representation learning. *Proceedings of the IEEE*, 109(5):612–634, 2021.
- 525 R. D. Shah and J. Peters. The hardness of conditional independence testing and the generalised  
526 covariance measure. *The Annals of Statistics*, 48(3):1514–1538, 2020.
- 527 S. Shimizu, P. O. Hoyer, A. Hyvärinen, A. Kerminen, and M. Jordan. A linear non-gaussian acyclic  
528 model for causal discovery. *Journal of Machine Learning Research*, 7(10), 2006.
- 529 R. Silva, R. Scheines, C. Glymour, P. Spirtes, and D. M. Chickering. Learning the structure of linear  
530 latent variable models. *Journal of Machine Learning Research*, 7(2), 2006.
- 531 C. Squires, A. Seigal, S. S. Bhate, and C. Uhler. Linear causal disentanglement via interventions. In  
532 *International Conference on Machine Learning*, volume 202, pages 32540–32560. PMLR, 2023.
- 533 E. V. Strobl, K. Zhang, and S. Visweswaran. Approximate kernel-based conditional independence  
534 tests for fast non-parametric causal discovery. *Journal of Causal Inference*, 7(1):20180017, 2019.

535 Y. Sun, L. Kong, G. Chen, L. Li, G. Luo, Z. Li, Y. Zhang, Y. Zheng, M. Yang, P. Stojanov, et al.  
536 Causal representation learning from multimodal biomedical observations. In *The Thirteenth In-*  
537 *ternational Conference on Learning Representations*, 2025.

538 B. Varici, E. Acartürk, K. Shanmugam, and A. Tajer. General identifiability and achievability for  
539 causal representation learning. In *International Conference on Artificial Intelligence and Statis-*  
540 *tics*, pages 2314–2322. PMLR, 2024.

541 J. von Kügelgen, Y. Sharma, L. Gresele, W. Brendel, B. Schölkopf, M. Besserve, and F. Locatello.  
542 Self-supervised learning with data augmentations provably isolates content from style. *Advances*  
543 *in Neural Information Processing Systems*, 34:16451–16467, 2021.

544 J. von Kügelgen, M. Besserve, L. Wendong, L. Gresele, A. Kekić, E. Bareinboim, D. Blei, and  
545 B. Schölkopf. Nonparametric identifiability of causal representations from unknown interventions.  
546 *Advances in Neural Information Processing Systems*, 36, 2024.

547 F. Xie, B. Huang, Z. Chen, R. Cai, C. Glymour, Z. Geng, and K. Zhang. Generalized independent  
548 noise condition for estimating causal structure with latent variables. *Journal of Machine Learning*  
549 *Research*, 25(191):1–61, 2024.

550 D. Yao, C. Muller, and F. Locatello. Marrying causal representation learning with dynamical systems  
551 for science. *Advances in Neural Information Processing Systems*, 37, 2024a.

552 D. Yao, D. Xu, S. Lachapelle, S. Magliacane, P. Taslakian, G. Martius, J. von Kügelgen, and F. Lo-  
553 catello. Multi-view causal representation learning with partial observability. In *The Twelfth Inter-*  
554 *national Conference on Learning Representations*, 2024b.

555 D. Yao, D. Rancati, R. Cadei, M. Fumero, and F. Locatello. Unifying causal representation learning  
556 with the invariance principle. *The Thirteenth International Conference on Learning Representa-*  
557 *tions*, 2025.

558 W. Yao, G. Chen, and K. Zhang. Temporally disentangled representation learning. *Advances in*  
559 *Neural Information Processing Systems*, 35:26492–26503, 2022.

560 J. Zhang, K. Greenewald, C. Squires, A. Srivastava, K. Shanmugam, and C. Uhler. Identifiability  
561 guarantees for causal disentanglement from soft interventions. *Advances in Neural Information*  
562 *Processing Systems*, 36, 2024a.

563 K. Zhang, J. Peters, D. Janzing, and B. Schölkopf. Kernel-based conditional independence test and  
564 application in causal discovery. *arXiv preprint arXiv:1202.3775*, 2012.

565 K. Zhang, M. Gong, P. Stojanov, B. Huang, Q. Liu, and C. Glymour. Domain adaptation as a  
566 problem of inference on graphical models. *Advances in Neural Information Processing Systems*,  
567 33, 2020.

568 K. Zhang, S. Xie, I. Ng, and Y. Zheng. Causal representation learning from multiple distributions:  
569 A general setting. *Internatinal Conference on Machine Learning*, 2024b.

570 Y. Zheng, I. Ng, and K. Zhang. On the identifiability of nonlinear ICA: Sparsity and beyond. *Ad-*  
571 *vances in neural information processing systems*, 35:16411–16422, 2022.

572 Y. Zheng, B. Huang, W. Chen, J. Ramsey, M. Gong, R. Cai, S. Shimizu, P. Spirtes, and K. Zhang.  
573 Causal-learn: Causal discovery in python. *Journal of Machine Learning Research*, 25(60):1–8,  
574 2024.



## NeurIPS Paper Checklist

### 1. Claims

Question: Do the main claims made in the abstract and introduction accurately reflect the paper's contributions and scope?

Answer: [\[Yes\]](#)

Justification: We formalize the measurement framework in § 2, define the evaluation metric T-MEX in § 3 and show its effectiveness in § 5.

Guidelines:

- The answer NA means that the abstract and introduction do not include the claims made in the paper.
- The abstract and/or introduction should clearly state the claims made, including the contributions made in the paper and important assumptions and limitations. A No or NA answer to this question will not be perceived well by the reviewers.
- The claims made should match theoretical and experimental results, and reflect how much the results can be expected to generalize to other settings.
- It is fine to include aspirational goals as motivation as long as it is clear that these goals are not attained by the paper.

### 2. Limitations

Question: Does the paper discuss the limitations of the work performed by the authors?

Answer: [\[Yes\]](#)

Justification: Limitations of the work is discussed in § 6.

Guidelines:

- The answer NA means that the paper has no limitation while the answer No means that the paper has limitations, but those are not discussed in the paper.
- The authors are encouraged to create a separate "Limitations" section in their paper.
- The paper should point out any strong assumptions and how robust the results are to violations of these assumptions (e.g., independence assumptions, noiseless settings, model well-specification, asymptotic approximations only holding locally). The authors should reflect on how these assumptions might be violated in practice and what the implications would be.
- The authors should reflect on the scope of the claims made, e.g., if the approach was only tested on a few datasets or with a few runs. In general, empirical results often depend on implicit assumptions, which should be articulated.
- The authors should reflect on the factors that influence the performance of the approach. For example, a facial recognition algorithm may perform poorly when image resolution is low or images are taken in low lighting. Or a speech-to-text system might not be used reliably to provide closed captions for online lectures because it fails to handle technical jargon.
- The authors should discuss the computational efficiency of the proposed algorithms and how they scale with dataset size.
- If applicable, the authors should discuss possible limitations of their approach to address problems of privacy and fairness.
- While the authors might fear that complete honesty about limitations might be used by reviewers as grounds for rejection, a worse outcome might be that reviewers discover limitations that aren't acknowledged in the paper. The authors should use their best judgment and recognize that individual actions in favor of transparency play an important role in developing norms that preserve the integrity of the community. Reviewers will be specifically instructed to not penalize honesty concerning limitations.

### 3. Theory assumptions and proofs

Question: For each theoretical result, does the paper provide the full set of assumptions and a complete (and correct) proof?

Answer: [\[Yes\]](#)

Justification: We summarize the property of the proposed T-MEX score in Prop. 3.1 and provide the proof in App. C.

Guidelines:

- The answer NA means that the paper does not include theoretical results.
- All the theorems, formulas, and proofs in the paper should be numbered and cross-referenced.
- All assumptions should be clearly stated or referenced in the statement of any theorems.
- The proofs can either appear in the main paper or the supplemental material, but if they appear in the supplemental material, the authors are encouraged to provide a short proof sketch to provide intuition.
- Inversely, any informal proof provided in the core of the paper should be complemented by formal proofs provided in appendix or supplemental material.
- Theorems and Lemmas that the proof relies upon should be properly referenced.

#### 4. Experimental result reproducibility

Question: Does the paper fully disclose all the information needed to reproduce the main experimental results of the paper to the extent that it affects the main claims and/or conclusions of the paper (regardless of whether the code and data are provided or not)?

Answer: [Yes]

Justification: Details about data generating pipeline, model architecture and training setup are provided in App. D for all experiments. Experimental results can be reproduced following the Readme .md file provided in the supplementary materials.

Guidelines:

- The answer NA means that the paper does not include experiments.
- If the paper includes experiments, a No answer to this question will not be perceived well by the reviewers: Making the paper reproducible is important, regardless of whether the code and data are provided or not.
- If the contribution is a dataset and/or model, the authors should describe the steps taken to make their results reproducible or verifiable.
- Depending on the contribution, reproducibility can be accomplished in various ways. For example, if the contribution is a novel architecture, describing the architecture fully might suffice, or if the contribution is a specific model and empirical evaluation, it may be necessary to either make it possible for others to replicate the model with the same dataset, or provide access to the model. In general, releasing code and data is often one good way to accomplish this, but reproducibility can also be provided via detailed instructions for how to replicate the results, access to a hosted model (e.g., in the case of a large language model), releasing of a model checkpoint, or other means that are appropriate to the research performed.
- While NeurIPS does not require releasing code, the conference does require all submissions to provide some reasonable avenue for reproducibility, which may depend on the nature of the contribution. For example
  - (a) If the contribution is primarily a new algorithm, the paper should make it clear how to reproduce that algorithm.
  - (b) If the contribution is primarily a new model architecture, the paper should describe the architecture clearly and fully.
  - (c) If the contribution is a new model (e.g., a large language model), then there should either be a way to access this model for reproducing the results or a way to reproduce the model (e.g., with an open-source dataset or instructions for how to construct the dataset).
  - (d) We recognize that reproducibility may be tricky in some cases, in which case authors are welcome to describe the particular way they provide for reproducibility. In the case of closed-source models, it may be that access to the model is limited in some way (e.g., to registered users), but it should be possible for other researchers to have some path to reproducing or verifying the results.

## 5. Open access to data and code

Question: Does the paper provide open access to the data and code, with sufficient instructions to faithfully reproduce the main experimental results, as described in supplemental material?

Answer: [Yes]

Justification: We include the experimental and implementation details for both experiments (§ 5) in App. D. The dataset we used in § 5.2 is publicly available at <https://doi.org/10.6084/m9.figshare.26484934.v2>. Code for generating the numerical datasets (§ 5.1), training, and evaluation for both experiments is all included in the supplementary material, following NeurIPS code and data submission guidelines. Curated code will be published upon acceptance.

Guidelines:

- The answer NA means that paper does not include experiments requiring code.
- Please see the NeurIPS code and data submission guidelines (<https://nips.cc/public/guides/CodeSubmissionPolicy>) for more details.
- While we encourage the release of code and data, we understand that this might not be possible, so No is an acceptable answer. Papers cannot be rejected simply for not including code, unless this is central to the contribution (e.g., for a new open-source benchmark).
- The instructions should contain the exact command and environment needed to run to reproduce the results. See the NeurIPS code and data submission guidelines (<https://nips.cc/public/guides/CodeSubmissionPolicy>) for more details.
- The authors should provide instructions on data access and preparation, including how to access the raw data, preprocessed data, intermediate data, and generated data, etc.
- The authors should provide scripts to reproduce all experimental results for the new proposed method and baselines. If only a subset of experiments are reproducible, they should state which ones are omitted from the script and why.
- At submission time, to preserve anonymity, the authors should release anonymized versions (if applicable).
- Providing as much information as possible in supplemental material (appended to the paper) is recommended, but including URLs to data and code is permitted.

## 6. Experimental setting/details

Question: Does the paper specify all the training and test details (e.g., data splits, hyperparameters, how they were chosen, type of optimizer, etc.) necessary to understand the results?

Answer: [Yes]

Justification: Experimental details (including experiment setup, training, and testing details) for both experiments are specified in App. D.

Guidelines:

- The answer NA means that the paper does not include experiments.
- The experimental setting should be presented in the core of the paper to a level of detail that is necessary to appreciate the results and make sense of them.
- The full details can be provided either with the code, in appendix, or as supplemental material.

## 7. Experiment statistical significance

Question: Does the paper report error bars suitably and correctly defined or other appropriate information about the statistical significance of the experiments?

Answer: [Yes]

Justification: We repeat our numerical simulations across multiple datasets to showcase the statistical validity of our proposed T-MEX score (see § 5.1). In real-world scenarios where additional simulated datasets are unavailable, we apply additional statistical tests to demonstrate that our experimental findings are statistically significant, see § 5.2.

Guidelines:

- The answer NA means that the paper does not include experiments.
- The authors should answer "Yes" if the results are accompanied by error bars, confidence intervals, or statistical significance tests, at least for the experiments that support the main claims of the paper.
- The factors of variability that the error bars are capturing should be clearly stated (for example, train/test split, initialization, random drawing of some parameter, or overall run with given experimental conditions).
- The method for calculating the error bars should be explained (closed form formula, call to a library function, bootstrap, etc.)
- The assumptions made should be given (e.g., Normally distributed errors).
- It should be clear whether the error bar is the standard deviation or the standard error of the mean.
- It is OK to report 1-sigma error bars, but one should state it. The authors should preferably report a 2-sigma error bar than state that they have a 96% CI, if the hypothesis of Normality of errors is not verified.
- For asymmetric distributions, the authors should be careful not to show in tables or figures symmetric error bars that would yield results that are out of range (e.g. negative error rates).
- If error bars are reported in tables or plots, The authors should explain in the text how they were calculated and reference the corresponding figures or tables in the text.

## 8. Experiments compute resources

Question: For each experiment, does the paper provide sufficient information on the computer resources (type of compute workers, memory, time of execution) needed to reproduce the experiments?

Answer: [Yes]

Justification: Compute-related information is provided in App. D.

Guidelines:

- The answer NA means that the paper does not include experiments.
- The paper should indicate the type of compute workers CPU or GPU, internal cluster, or cloud provider, including relevant memory and storage.
- The paper should provide the amount of compute required for each of the individual experimental runs as well as estimate the total compute.
- The paper should disclose whether the full research project required more compute than the experiments reported in the paper (e.g., preliminary or failed experiments that didn't make it into the paper).

## 9. Code of ethics

Question: Does the research conducted in the paper conform, in every respect, with the NeurIPS Code of Ethics <https://neurips.cc/public/EthicsGuidelines>?

Answer: [Yes]

Justification: The authors carefully reviewed the NeurIPS Code of Ethics and believe none of the concerns from NeurIPS Code of Ethics applies to this work.

Guidelines:

- The answer NA means that the authors have not reviewed the NeurIPS Code of Ethics.
- If the authors answer No, they should explain the special circumstances that require a deviation from the Code of Ethics.
- The authors should make sure to preserve anonymity (e.g., if there is a special consideration due to laws or regulations in their jurisdiction).

## 10. Broader impacts

Question: Does the paper discuss both potential positive societal impacts and negative societal impacts of the work performed?

Answer: [NA]

Justification: This paper proposes a new theoretical perspective on causal representation learning; thus, there is no immediate positive or negative societal impact.

Guidelines:

- The answer NA means that there is no societal impact of the work performed.
- If the authors answer NA or No, they should explain why their work has no societal impact or why the paper does not address societal impact.
- Examples of negative societal impacts include potential malicious or unintended uses (e.g., disinformation, generating fake profiles, surveillance), fairness considerations (e.g., deployment of technologies that could make decisions that unfairly impact specific groups), privacy considerations, and security considerations.
- The conference expects that many papers will be foundational research and not tied to particular applications, let alone deployments. However, if there is a direct path to any negative applications, the authors should point it out. For example, it is legitimate to point out that an improvement in the quality of generative models could be used to generate deepfakes for disinformation. On the other hand, it is not needed to point out that a generic algorithm for optimizing neural networks could enable people to train models that generate Deepfakes faster.
- The authors should consider possible harms that could arise when the technology is being used as intended and functioning correctly, harms that could arise when the technology is being used as intended but gives incorrect results, and harms following from (intentional or unintentional) misuse of the technology.
- If there are negative societal impacts, the authors could also discuss possible mitigation strategies (e.g., gated release of models, providing defenses in addition to attacks, mechanisms for monitoring misuse, mechanisms to monitor how a system learns from feedback over time, improving the efficiency and accessibility of ML).

## 11. Safeguards

Question: Does the paper describe safeguards that have been put in place for responsible release of data or models that have a high risk for misuse (e.g., pretrained language models, image generators, or scraped datasets)?

Answer: [NA]

Justification: This paper does not release a new dataset or propose new models.

Guidelines:

- The answer NA means that the paper poses no such risks.
- Released models that have a high risk for misuse or dual-use should be released with necessary safeguards to allow for controlled use of the model, for example by requiring that users adhere to usage guidelines or restrictions to access the model or implementing safety filters.
- Datasets that have been scraped from the Internet could pose safety risks. The authors should describe how they avoided releasing unsafe images.
- We recognize that providing effective safeguards is challenging, and many papers do not require this, but we encourage authors to take this into account and make a best faith effort.

## 12. Licenses for existing assets

Question: Are the creators or original owners of assets (e.g., code, data, models), used in the paper, properly credited and are the license and terms of use explicitly mentioned and properly respected?

Answer: [Yes]

Justification: We carefully cited all datasets and works that were used in this paper. Also, the causal representation learning algorithm we used in App. D.1 and the statistical testing software (pycomets) are open-sourced under an MIT license.

Guidelines:

- The answer NA means that the paper does not use existing assets.



- The authors should cite the original paper that produced the code package or dataset.
- The authors should state which version of the asset is used and, if possible, include a URL.
- The name of the license (e.g., CC-BY 4.0) should be included for each asset.
- For scraped data from a particular source (e.g., website), the copyright and terms of service of that source should be provided.
- If assets are released, the license, copyright information, and terms of use in the package should be provided. For popular datasets, [paperswithcode.com/datasets](https://paperswithcode.com/datasets) has curated licenses for some datasets. Their licensing guide can help determine the license of a dataset.
- For existing datasets that are re-packaged, both the original license and the license of the derived asset (if it has changed) should be provided.
- If this information is not available online, the authors are encouraged to reach out to the asset's creators.

### 13. New assets

Question: Are new assets introduced in the paper well documented and is the documentation provided alongside the assets?

Answer: [Yes]

Justification: This work focuses on a new formalism and evaluation scheme of causal representation learning. Thus, we do not release new assets other than the source code to reproduce the experimental results. This code is attached to the submission, and all corresponding training details are documented in App. D for reproducing.

Guidelines:

- The answer NA means that the paper does not release new assets.
- Researchers should communicate the details of the dataset/code/model as part of their submissions via structured templates. This includes details about training, license, limitations, etc.
- The paper should discuss whether and how consent was obtained from people whose asset is used.
- At submission time, remember to anonymize your assets (if applicable). You can either create an anonymized URL or include an anonymized zip file.

### 14. Crowdsourcing and research with human subjects

Question: For crowdsourcing experiments and research with human subjects, does the paper include the full text of instructions given to participants and screenshots, if applicable, as well as details about compensation (if any)?

Answer: [NA]

Justification: This work does not involve human subjects or crowdsourcing.

Guidelines:

- The answer NA means that the paper does not involve crowdsourcing nor research with human subjects.
- Including this information in the supplemental material is fine, but if the main contribution of the paper involves human subjects, then as much detail as possible should be included in the main paper.
- According to the NeurIPS Code of Ethics, workers involved in data collection, curation, or other labor should be paid at least the minimum wage in the country of the data collector.

### 15. Institutional review board (IRB) approvals or equivalent for research with human subjects

Question: Does the paper describe potential risks incurred by study participants, whether such risks were disclosed to the subjects, and whether Institutional Review Board (IRB) approvals (or an equivalent approval/review based on the requirements of your country or institution) were obtained?

889 Answer: [NA]  
890 Justification: This work does not involve human subjects or crowdsourcing.  
891 Guidelines:  
892 • The answer NA means that the paper does not involve crowdsourcing nor research  
893 with human subjects.  
894 • Depending on the country in which research is conducted, IRB approval (or equiva-  
895 lent) may be required for any human subjects research. If you obtained IRB approval,  
896 you should clearly state this in the paper.  
897 • We recognize that the procedures for this may vary significantly between institutions  
898 and locations, and we expect authors to adhere to the NeurIPS Code of Ethics and the  
899 guidelines for their institution.  
900 • For initial submissions, do not include any information that would break anonymity  
901 (if applicable), such as the institution conducting the review.

902 **16. Declaration of LLM usage**

903 Question: Does the paper describe the usage of LLMs if it is an important, original, or  
904 non-standard component of the core methods in this research? Note that if the LLM is used  
905 only for writing, editing, or formatting purposes and does not impact the core methodology,  
906 scientific rigorousness, or originality of the research, declaration is not required.

907 Answer: [NA]

908 Justification: The core method development in this research does not involve LLMs as any  
909 important, original, or non-standard components.

910 Guidelines:  
911 • The answer NA means that the core method development in this research does not  
912 involve LLMs as any important, original, or non-standard components.  
913 • Please refer to our LLM policy (<https://neurips.cc/Conferences/2025/LLM>) for what  
914 should or should not be described.

# Appendix

## Table of Contents

|                                                                       |           |
|-----------------------------------------------------------------------|-----------|
| <b>A Notation and Terminology</b>                                     | <b>21</b> |
| <b>B Preliminaries</b>                                                | <b>21</b> |
| <b>C Proofs and Algorithms</b>                                        | <b>21</b> |
| <b>D Experiment Details and Additional Results</b>                    | <b>23</b> |
| D.1 Numerical Simulation . . . . .                                    | 23        |
| D.2 Real-World Ecological Experiment: ISTAnt . . . . .                | 24        |
| D.3 Caveats of Using SHD to Evaluate Causal Representations . . . . . | 25        |
| <b>E Background on Conditional Independence Testing</b>               | <b>26</b> |
| <b>F Extended Discussion</b>                                          | <b>27</b> |
| F.1 Representations of Treatment and Outcome . . . . .                | 27        |
| F.2 Representations of Confounders or Instruments . . . . .           | 28        |

## A Notation and Terminology

This section summarizes the symbols used throughout the paper.

|                     |                                                              |
|---------------------|--------------------------------------------------------------|
| <b>Z</b>            | Causal variables                                             |
| <b>X</b>            | Observables                                                  |
| $D_j$               | Dimension of the representation $\widehat{\mathbf{Z}}_{A_j}$ |
| $N$                 | Dimension of the causal variables <b>Z</b>                   |
| $n$                 | Number of samples for the statistical tests for T-MEX        |
| $\mathbb{P}(\cdot)$ | Probability operator                                         |
| $\mathbb{E}(\cdot)$ | Expectation operator                                         |
| $\mathbb{1}(\cdot)$ | Indicator function                                           |

## B Preliminaries

**Definition B.1** (Block-identifiability (von Kügelgen et al., 2021)). A set of latent variables  $\mathbf{Z} \in \mathbb{R}^{d_z}$  is block-identified by a representation  $\widehat{\mathbf{Z}} \in \mathbb{R}^{d_z}$  if there exists a bijection  $h : \mathbb{R}^{d_z} \rightarrow \mathbb{R}^{d_z}$  such that  $\widehat{\mathbf{Z}} = h(\mathbf{Z})$ . 

## C Proofs and Algorithms

This section includes the proof for Prop. 3.1 and the algorithm to compute the T-MEX score.

**Proposition 3.1.** *Let  $\{\varphi_{ij}\}_{i \in [N], j \in [M]}$  be a family of tests for eq. (3.1) where for all  $i \in [N]$  and  $j \in [M]$ ,  $\varphi_{ij}$  is valid with level  $\alpha \in (0, 1)$  and has power at least  $\beta \in (0, 1)$ . Given an adjacency matrix  $V \in \mathbb{R}^{N \times M}$  based on a measurement model, if the joint distribution  $P_{\mathbf{Z}, \widehat{\mathbf{Z}}}$  of the causal and measurement variables does align with the measurement model, and each entry in  $\widehat{W}$  is computed based*

---

**Algorithm 1:** Compute T-MEX score from one set of samples
 

---

**Input:** Paired samples of causal variables and measurement variables  $\{\mathbf{z}, \hat{\mathbf{z}}_{A_1}, \dots, \hat{\mathbf{z}}_{A_M}\}$  where  $\mathbf{z} \in \mathbb{R}^{n \times N}$  and  $\hat{\mathbf{z}}_{A_j} \in \mathbb{R}^{n \times D_j}$  for  $j \in [M]$ , adjacency matrix of the measurement model  $V \in \{0, 1\}^{N \times M}$ , a set of statistical tests for  $\{\varphi_{ij}\}_{i \in [N], j \in [M]}$  for (3.1), where for all  $i \in [N], j \in [M]$ ,  $\varphi_{ij} : \mathbb{R}^{n \times 1} \times \mathbb{R}^{n \times D_j} \times \mathbb{R}^{n \times (N-1)} \rightarrow \{0, 1\}$

**Output:** T-MEX score of the given sample

```

 $\widehat{W} \leftarrow \mathbf{0}^{N \times M}$ 
for  $i \in [N]$  do
  for  $j \in [M]$  do
     $\widehat{W}_{ij} \leftarrow \varphi_{ij}(\mathbf{z}_i, \hat{\mathbf{z}}_{A_j}, \mathbf{z}_{[N] \setminus \{i\}})$ 
  end
end
return  $\sum_{i=1}^N \sum_{j=1}^M \mathbb{1}(V_{ij} \neq \widehat{W}_{ij})$ 
  
```

---

954 on an independent set of samples  $\{(\mathbf{z}^k, \hat{\mathbf{z}}^k)\}_{k \in [n_{ij}]}$ ,  $n_{ij} \in \mathbb{N}_+$ , then the expected T-MEX satisfies

$$\mathbb{E}[\text{T-MEX}(V, \widehat{W})] \leq \alpha \cdot (MN - \|V\|_1) + (1 - \beta) \cdot \|V\|_1,$$

955 where  $\|V\|_1 = \sum_{i=1}^N \sum_{j=1}^M V_{ij}$  is the  $L_1$ -norm of  $V$ .

956 *Proof.* Suppose the joint distribution of  $(\mathbf{Z}, \widehat{\mathbf{Z}})$  aligns with the conditional independencies indicated by the adjacency matrix  $V$ , that is, for all  $i \in [N]$  and  $j \in [M]$ , if  $V_{ij} = 0$ , it holds that  $\widehat{\mathbf{Z}}_{A_j} \perp\!\!\!\perp \mathbf{Z}_i \mid \mathbf{Z}_{[N] \setminus \{i\}}$ ; if  $V_{ij} = 1$ , it holds that  $\widehat{\mathbf{Z}}_{A_j} \not\perp\!\!\!\perp \mathbf{Z}_i \mid \mathbf{Z}_{[N] \setminus \{i\}}$ .

959 Fix a significance level  $\alpha \in (0, 1)$ . Suppose for all  $i \in [N]$  and all  $j \in [M]$ , the statistical test  $\varphi_{ij} : \mathbb{R}^{n \times 1} \times \mathbb{R}^{n \times D_j} \times \mathbb{R}^{n \times (N-1)} \rightarrow \{0, 1\}$  is valid at level  $\alpha$  and has power at least  $\beta \in [0, 1]$  against the alternative distribution where  $\widehat{\mathbf{Z}}_{A_j} \not\perp\!\!\!\perp \mathbf{Z}_i \mid \mathbf{Z}_{[N] \setminus \{i\}}$ .

962 Then given independent sets of samples  $\{\mathbf{z}^k, \hat{\mathbf{z}}^k\}_{k \in [n_{ij}]}$  for  $i \in [N]$  and  $j \in [M]$ , and  $\widehat{W}_{ij} = \varphi_{ij}(\mathbf{z}_i, \hat{\mathbf{z}}_{A_j}, \mathbf{z}_{[N] \setminus \{i\}})$ , it holds that

- 964 • if  $V_{ij} = 0$ , then  $P(\widehat{W}_{ij} = 1) \leq \alpha$ ;
- 965 • if  $V_{ij} = 1$ , then  $P(\widehat{W}_{ij} = 0) \leq 1 - \beta$ .

966 Therefore, the expected value of T-MEX score is given by

$$\begin{aligned} \mathbb{E}[\text{T-MEX}(V, \widehat{W})] &= \alpha \cdot \sum_{i,j} \mathbb{1}(V_{ij} = 0) + (1 - \beta) \sum_{i,j} \mathbb{1}(V_{ij} = 1) \\ &\leq \alpha \cdot (MN - \|V\|_1) + (1 - \beta) \cdot \|V\|_1 \end{aligned}$$

967 where  $\|V\|_1$  is the 1-norm of  $V$ . The second inequality is implied by the that each test  $\varphi_{ij}$  is valid with level  $\alpha$  and has power  $\geq \beta$ .  $\square$

969 *Remark C.1.* Proposition 3.1 tells us that if the measurement model does hold for the joint distribution of the causal variables and the output representations from a trained CRL model, we would expect to see a “low” T-MEX score given that we employ valid statistical tests that are also powerful enough to reject the null under alternatives. A “low” T-MEX score does not in general refer to a 0 score, as it depends on  $V$ , the chosen significance level  $\alpha$ , and the power of the test  $\beta$ . For example, let  $\alpha = 0.05$ , we consider a valid statistical test that has the highest power, i.e.,  $\beta = 1$ , additionally, assume the number of 0s in  $V$  is 2, then the expected value of the T-MEX score is no larger than  $0.05 \times 2 = 0.1$ .  $\spadesuit$

## D Experiment Details and Additional Results

This section elaborates on the experiment settings of § 5. We include further information regarding the data-generating process for the simulated experiment (§ 5.1) and the ISTAnt dataset (Cadei et al., 2024) used in the ecological case study (§ 5.2), as well as additional experimental results.

### D.1 Numerical Simulation

**Experiment setting.** We consider five causal variables  $(\mathbf{Z}_1, \dots, \mathbf{Z}_5)$  generated based on a linear structural causal model (Peters et al., 2017)

$$\mathbf{Z} = B\mathbf{Z} + \varepsilon,$$

where  $\mathbf{Z} := (\mathbf{Z}_1, \mathbf{Z}_2, \mathbf{Z}_3, \mathbf{Z}_4, \mathbf{Z}_5)$ ,  $\mathbf{Z}$  takes values in  $\mathbb{R}^5$ ,  $\varepsilon \sim \mathcal{N}_5(0, I)$ , and  $B = \begin{bmatrix} 0 & 0 & 0 & 0 & 0 \\ 1 & 0 & 0 & 0 & 1 \\ 1 & 1 & 0 & 0 & 0 \\ 1 & 0 & 0 & 0 & 0 \\ 1 & 0 & 0 & 1 & 0 \end{bmatrix}$ ,

which induces the partial DAG depicted in Fig. 2. Two of the causal variables ( $\mathbf{Z}_4$  and  $\mathbf{Z}_5$ ) are observed (i.e., directly measured as in Defn. 2.1), and the other three ( $\mathbf{Z}_1$ ,  $\mathbf{Z}_2$ , and  $\mathbf{Z}_3$ ) are latent and we observe only a bijective mixing  $\mathbf{X}$  of them.

For the purpose of latent variable identification, we consider the multiview scenario in (Yao et al., 2024b) where two views  $\mathbf{X}_1, \mathbf{X}_2$  are generated from different subsets of latent variables. Formally, we have

$$\begin{aligned} \mathbf{X}_1 &= f_1(\mathbf{Z}_1, \mathbf{Z}_2) \\ \mathbf{X}_2 &= f_2(\mathbf{Z}_1, \mathbf{Z}_3), \end{aligned} \tag{D.1}$$

where  $f_1, f_2 : \mathbb{R}^2 \rightarrow \mathbb{R}^2$  are diffeomorphisms, implemented using invertible MLPs as suggested by Yao et al. (2024b).

**Implementation details.** We employ the latent variable identification algorithm proposed by Yao et al. (2024b), which guarantees that the shared latent variables among different views can be identified up to a diffeomorphism in the sense of Defn. B.1. Thus, by utilizing  $\mathbf{X}_1, \mathbf{X}_2$ , we can obtain a nonlinear bijective transformation of their shared latent variable  $\mathbf{Z}_1$ . This allows us to construct a measurement model  $\mathcal{M} = \langle \mathbf{Z}, \hat{\mathbf{Z}}_{A_1}, \{h_1\} \rangle$  (see Fig. 2), where  $\mathbf{Z} = \{\mathbf{Z}_1, \dots, \mathbf{Z}_5\}$  and  $\hat{\mathbf{Z}}_{A_1} = h(\mathbf{Z}_1)$  for some (unknown) smooth invertible map  $h : \mathbb{R} \rightarrow \mathbb{R}$ .

We train three CRL models following the implementation settings in (Yao et al., 2024b, Tab. 4).

- **Model A:** a sufficiently trained model (trained for 50001 steps) from which we expect the learned representation  $\hat{\mathbf{Z}}_{A_1}^A$  (where by a slight abuse of notation, the superscript represents the model indicator) to *exclusively measure*  $\mathbf{Z}_1$ ;
- **Model B:** an insufficiently trained model (trained for 51 steps) with unclear latent-measurement correspondence;
- **Model C:** a corrupted version of Model A where the representation  $\hat{\mathbf{Z}}_{A_1}^C := \hat{\mathbf{Z}}_{A_1}^A + 0.2\mathbf{Z}_2 - 0.1\mathbf{Z}_3$ , i.e., a linear mixing of the representation  $\hat{\mathbf{Z}}_{A_1}^A$  from Model A, and  $\mathbf{Z}_2, \mathbf{Z}_3$ .

For each of the three trained models, we generate 50 independent datasets, each containing 4096 paired samples of  $\mathbf{Z}, \hat{\mathbf{Z}}_{A_1}$ . We compute the respective T-MEX scores based on these generated datasets for all three models, using the projected covariance measure (PCM, Lundborg et al., 2024) implemented in `pycomets` (Huang and Kook, 2025) using linear regression models to estimate the conditional means (see App. E).

**Additional results.** Since T-MEX relies on statistical testing, we further assess its statistical validity by examining the underlying p-values that lead to the test results and the T-MEX score. Fig. 6 shows the p-values resulted from testing each of the three null hypotheses:

$$\mathcal{H}_0(i) : \hat{\mathbf{Z}}_{A_1} \perp\!\!\!\perp \mathbf{Z}_i \mid \mathbf{Z}_{[5]\setminus i} \text{ for } i \in [3].$$

We omit  $\mathbf{Z}_4$  and  $\mathbf{Z}_5$  since they are not involved in generating the two views  $\mathbf{X}_1$  and  $\mathbf{X}_2$ .



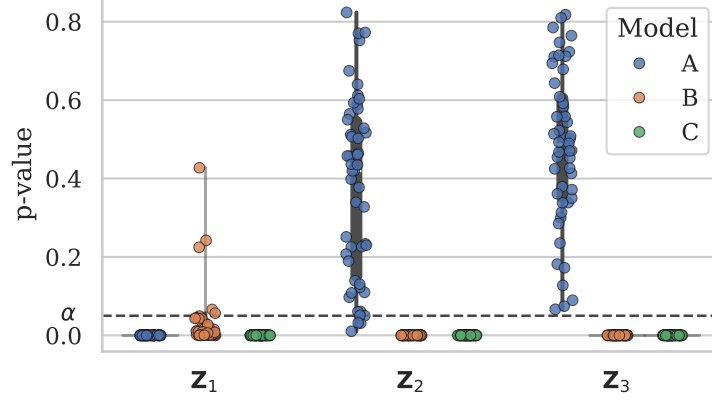

Figure 6: Violin plots of p-values from testing the conditional independencies  $\hat{\mathbf{Z}}_{A_1} \perp\!\!\!\perp \mathbf{Z}_i \mid \mathbf{Z}_{[5]\setminus i}$  for  $i \in [3]$  based on the PCM tests (Lundborg et al., 2024). The black dashed line is at the significance level  $\alpha = 0.05$ . A p-value  $< \alpha$  for  $\mathbf{Z}_i$  means there is an edge from  $\mathbf{Z}_i$  to the measurement  $\hat{\mathbf{Z}}_{A_1}$ .

Fig. 6 shows that Model A aligns with the measurement model in Fig. 2, evidenced by (i) small p-values for  $\mathcal{H}_0(1)$  and (ii) approximately uniformly distributed p-values for both  $\mathcal{H}_0(2)$  and  $\mathcal{H}_0(3)$ , given a valid test (see App. E for further explanations). In contrast, for Models B and C, nearly all p-values are smaller than  $\alpha$ , leading to rejections of the null hypotheses, which indicates that the learned representation  $\hat{\mathbf{Z}}_{A_1}$  is a mixture of all three causal variables  $\mathbf{Z}_1, \mathbf{Z}_2, \mathbf{Z}_3$ , and thus fails to exclusively measure  $\mathbf{Z}_1$ .

**Computational resources.** We train the CRL models (model A, B, C) using a single node GPU (NVIDIA GeForce RTX1080Ti) with 10GB of RAM, 4 CPU cores for less than one GPU hour. ATE estimation and T-MEX computation take less than one minute on a standard CPU.

## D.2 Real-World Ecological Experiment: ISTAnt

**Experiment Setting.** ISTAnt is a real-world ecological benchmark designed to evaluate learned representations on downstream causal inference tasks from high-dimensional observational data. It comprises 44 ant-triplet video recordings collected through a randomized controlled trial. This benchmark adopts the problem formulation introduced by Cadei et al. (2024), aiming to estimate the causal effect of specific treatments (e.g., chemical exposure) on ants social behavior, particularly grooming events. The experimental design and recording setup are shown in Fig. 7; for further details, refer to (Cadei et al., 2024, App. C).

In ISTAnt, each observation (video recording)  $i$  is associated with a treatment assignment  $\mathbf{T}_i$  and a set of experimental covariates  $\mathbf{W}_i$  (including experiment day, time of the day, batch, position within the batch, and annotator). However, only a subset of videos is annotated with the outcome of interest  $\mathbf{Y}_i$  (i.e., grooming events), which hinders reliable causal inference at a population level, such as treatment effect estimation. To address this challenge, Cadei et al. (2024) proposes to train a classifier on top of a pre-trained feature extractor (e.g., DINOv2 (Oquab et al., 2023)) using this limited set of annotated samples, to impute missing labels while still enabling valid causal inference at the population level; specifically, for estimating the Average Treatment Effect (ATE).

**Implementation details.** Following (Cadei et al., 2024), we train 2,400 classification heads on top of DINOv2 (Oquab et al., 2023), varying the architecture and training settings, and estimate the causal effect using all video samples together with the predicted labels  $\hat{\mathbf{Y}}$ s by AIPW estimator (Robins et al., 1994). The hyperparameter configurations are summarized in Tab. 2, with all other implementation details following (Cadei et al., 2024, App. C).

By contrasting with the measurement model depicted in Fig. 4, we compute the T-MEX scores for all 2,400 models. Since we focus on models with more than 80% prediction accuracy (§ 5.2), the null hypothesis  $\hat{\mathbf{Y}} \perp\!\!\!\perp \mathbf{Y} \mid \mathbf{T}$  is rejected in all cases, consistently indicating  $\mathbf{Y} \rightarrow \hat{\mathbf{Y}}$ . Thus, we only

Table 2: Hyperparameters for the real-world ecological experiment (§ 5.2 and App. D.2), giving rise to 2,400 model configurations in total. All other settings follow (Cadei et al., 2024, App. C).

| Hyperparameter          | Value(s)                                                                                                                    |
|-------------------------|-----------------------------------------------------------------------------------------------------------------------------|
| Input Preprocessing     | YES / NO                                                                                                                    |
| Number of Hidden Layers | 1, 2                                                                                                                        |
| Batch Size              | 64, 128, 256                                                                                                                |
| Adam: learning rate     | 5e-2, 1e-2, 5e-3, 1e-3, 5e-4                                                                                                |
| Training objective      | Empirical Risk, Invariant Risk (Arjovsky et al., 2020), vREx (Krueger et al., 2021), Deconfounded Risk (Cadei et al., 2025) |
| # Seeds                 | 0,1, ..., 9                                                                                                                 |

1049 focus on the following null hypothesis:

$$\mathcal{H}_0 : \hat{\mathbf{Y}} \perp\!\!\!\perp \mathbf{T} \mid \mathbf{Y},$$

1050 where  $\hat{\mathbf{Y}}$  denotes the predicted label and  $\mathbf{Y}$  the ground truth one. A misalignment with the mea-  
1051 surement model in Fig. 4 leads to rejecting  $\mathcal{H}_0$ , resulting T-MEX=1, whereas as a causally valid  
1052 representation  $\hat{\mathbf{Y}}$  that exclusively measures  $\mathbf{Y}$  gives rise to T-MEX=0. We summarize all results  
1053 in Fig. 5 and provide extended discussions in § 5.2.

1054 **Computational resources.** We run all the analyses in § 5.2 using 48GB of RAM, 20 CPU cores,  
1055 and a single node GPU (NVIDIA GeForce RTX2080Ti) for 24 GPU hours. Data preprocessing  
1056 and feature extraction using DINOv2 account for the majority of the computational time, whereas  
1057 classifier training, AIPW estimation, and the T-MEX test contribute negligibly by comparison.

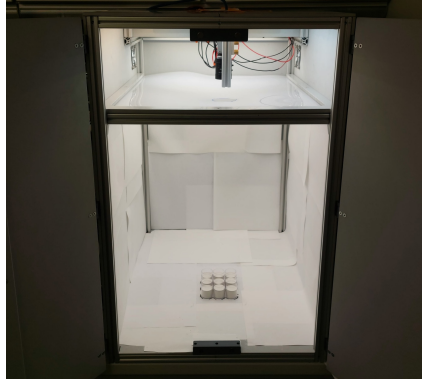

(a) Filming box

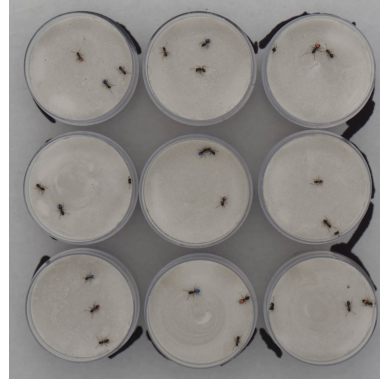

(b) Batch example

Figure 7: Visualization of ISTAnt recording set-up (Cadei et al., 2024).

### 1058 D.3 Caveats of Using SHD to Evaluate Causal Representations

1059 **Experiment Setting.** This experiment explores the poten-  
1060 tial pitfalls when directly using SHD to evaluate causal  
1061 representations without properly evaluating the element-  
1062 wise latent variable identification. Specifically, we con-  
1063 sider a set of causal variables generated through the fol-  
1064 lowing structural equations:

$$\begin{aligned} \mathbf{Z}_1 &= \epsilon_1 \\ \mathbf{Z}_2 &= \alpha_{12} \cdot \mathbf{Z}_1 + \beta_2 \cdot \epsilon_2 \\ \mathbf{Z}_3 &= \alpha_{13} \cdot \mathbf{Z}_1 + \alpha_{23} \cdot \mathbf{Z}_2 + \beta_3 \cdot \epsilon_3, \end{aligned} \quad (\text{D.2})$$

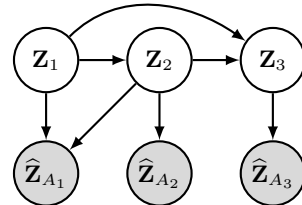

Figure 8: Example measurement model, where  $\hat{\mathbf{Z}}_{A_1}$  block-identifies  $\mathbf{Z}_1, \mathbf{Z}_2$ ,  $\hat{\mathbf{Z}}_{A_2}$  and  $\hat{\mathbf{Z}}_{A_3}$  identifies  $\mathbf{Z}_2, \mathbf{Z}_3$  respectively.

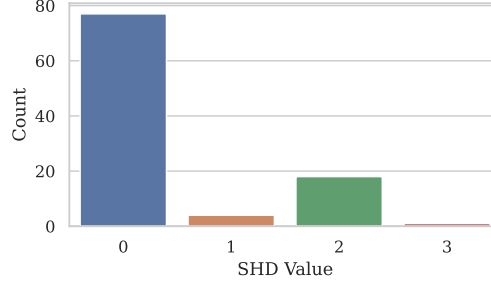

Figure 9: Structural Hamming Distance Values (SHD) of 100 structure and measurement models following eqs. (D.2) and (D.3), where the measurement  $\hat{\mathbf{Z}}_{A_1}$  is a mixing of the ground truth latent  $\mathbf{Z}_1, \mathbf{Z}_2$ . SHDs are computed between the discovered graph on  $\hat{\mathbf{Z}}$  and the ground truth one.

1065 Assume the learned representation corresponds to the ground truth causal variable as follows:

$$\begin{aligned}
 \hat{\mathbf{Z}}_{A_1} &= \gamma_1 \cdot \mathbf{Z}_1 + \gamma_{21} \cdot \mathbf{Z}_2 \\
 \hat{\mathbf{Z}}_{A_2} &= \gamma_2 \cdot \mathbf{Z}_2 \\
 \hat{\mathbf{Z}}_{A_3} &= \gamma_3 \cdot \mathbf{Z}_3
 \end{aligned} \tag{D.3}$$

1066 where  $\hat{\mathbf{Z}}_{A_1}$  remains a mixing of  $\mathbf{Z}_1$  and  $\mathbf{Z}_2$ . The corresponding measurement model is shown  
 1067 in Fig. 8.

1068 **Implementation details.** We generate 100 different structure and measurement models follow-  
 1069 ing eqs. (D.2) and (D.3), with all coefficients  $\alpha$ s and  $\gamma$ s sampled from  $\text{Unif}[1, 10]$  and the  $\beta$ s sam-  
 1070 pled from  $\text{Unif}[0.005, 0.02]$ . We run LiNGAM (Shimizu et al., 2006) from causal-learn (Zheng et al.,  
 1071 2024) to discover the causal relationships between the measurements  $\hat{\mathbf{Z}}_{A_1}, \hat{\mathbf{Z}}_{A_2}, \hat{\mathbf{Z}}_{A_3}$ .

1072 **Results.** Fig. 9 shows the structural hamming distance of between the discovered graph on  $\hat{\mathbf{Z}}$  and  
 1073 the ground truth one. Despite being entangled between  $\mathbf{Z}_1, \mathbf{Z}_2$ ,  $\hat{\mathbf{Z}}$  still yield the correct causal graph  
 1074 in most of the cases (77%), as shown by the first bar in the plot. Hence, causal relations between the  
 1075 measurement variables should always be evaluated in conjunction with the variable identification.  
 1076 Otherwise, it can lead to misinterpretations as showcased by Fig. 9.

1077 **Computational resources.** Data generating and causal discovery for App. D.3 in total takes less  
 1078 than 10 minutes on a standard CPU.

## 1079 E Background on Conditional Independence Testing

1080 Testing conditional independence of two random variables  $\mathbf{X}$  and  $\mathbf{Y}$  given a third random variable  
 1081  $\mathbf{Z}$  is known to be a difficult problem if  $\mathbf{Z}$  is a continuous variable (Shah and Peters, 2020). The goal  
 1082 of conditional independence test is to test the null hypothesis

$$\mathcal{H}_0 : \mathbf{X} \perp\!\!\!\perp \mathbf{Y} \mid \mathbf{Z}.$$

1083 Shah and Peters (2020) have shown that there is no valid test (i.e., a test that guarantees a Type I  
 1084 error rate to be no larger than the given significance level  $\alpha$ ) that has power against all alternatives.

1085 Consider univariate variables  $\mathbf{X}, \mathbf{Y}, \mathbf{Z}$ , the generalized covariance measure (GCM) test proposed in  
 1086 Shah and Peters (2020) aims to test an implication of conditional independence which can be written  
 1087 as the following null hypothesis:

$$\mathcal{H}_0^{\text{GCM}} : \mathbb{E}[(\mathbf{Y} - \mathbb{E}[\mathbf{Y} \mid \mathbf{Z}])(\mathbf{X} - \mathbb{E}[\mathbf{X} \mid \mathbf{Z}])] = 0.$$

1088 The validity of the GCM test thus relies on that the conditional means  $\mathbb{E}[\mathbf{Y} \mid \mathbf{Z}]$  and  $\mathbb{E}[\mathbf{X} \mid \mathbf{Z}]$  can be  
 1089 learned at sufficiently fast rates. It turns out that GCM does not have power against any alternative  
 1090 for which  $\mathbb{E}[\text{Cov}(\mathbf{X}, \mathbf{Y} \mid \mathbf{Z})] = 0$  but  $\mathbf{X} \not\perp\!\!\!\perp \mathbf{Y} \mid \mathbf{Z}$  (Lundborg et al., 2024).

1091 The projected covariance measure (PCM) proposed by Lundborg et al. (2024) improves the power  
 1092 issue of GCM by testing a different implication of conditional independence:

$$\mathcal{H}_0^{\text{PCM}} : \mathbb{E}[\mathbf{Y} \mid \mathbf{X}, \mathbf{Z}] = \mathbb{E}[\mathbf{Y} \mid \mathbf{Z}].$$

1093 Similar to GCM, to ensure its validity, PCM also requires that the conditional means can be learned  
 1094 sufficiently fast, which is satisfied in our experiments (§ 5).

1095 There are other conditional independence tests such as mutual information based methods (Ai et al.,  
 1096 2024; Runge, 2018) and kernel-based methods (Fernández and Rivera, 2024; Strobl et al., 2019;  
 1097 Zhang et al., 2012). We opted for PCM in our experiments for its computational advantage and the-  
 1098oretical guarantees on its validity under a flexible, model-agnostic framework. More discussions on  
 1099 the usage of PCM and GCM can be found in Kook and Lundborg (2024). Notably, T-MEX is a gen-  
 1100eral evaluation metric for causal representations that does not specify any particular type of tests, al-  
 1101lowing practitioners to choose other testing methods that are more suitable for their problem settings.

## 1102 F Extended Discussion

1103 This section elaborates on the implications of learned representations for downstream causal tasks.  
 1104 As briefly discussed in the main paper (following Defn. 2.2), a representation is *causally valid*  
 1105 (Defn. 2.2) with respect to a statistical estimand if and only if the statistical estimand remains un-  
 1106changed when plugging in the measurement variables correspond to the causal variables. More con-  
 1107cretely, we illustrate the implications of nonlinear invertible reparameterizations of causal variables  
 1108 in two commonly encountered scenarios: when representations serve as proxies of (i) the treatment  
 1109 or outcome variables, and (ii) the confounders or instrumental variables.

### 1110 F.1 Representations of Treatment and Outcome

1111 Assume in Fig. 10 that  $\hat{\mathbf{Z}}_{A_1}, \hat{\mathbf{Z}}_{A_2}$  are element-wise non-  
 1112linear invertible reparametrization of  $\mathbf{Z}_1, \mathbf{Z}_2$  respectively;  
 1113 i.e.,  $\forall i \in \{1, 2\}, \hat{\mathbf{Z}}_{A_i} = h_i(\mathbf{Z}_i)$  for some diffeomorphism  
 1114  $h_i : \mathbb{R} \rightarrow \mathbb{R}$ . We aim to estimate the treatment effect of  
 1115  $\mathbf{Z}_1 \rightarrow \mathbf{Z}_2$  using the learned representations  $\hat{\mathbf{Z}}_{A_1}$  and  $\hat{\mathbf{Z}}_{A_2}$ .

1116 Assume the  $\mathbf{Z}_2$  is generated following eq. (4.1), i.e.,

$$\mathbf{Z}_2 := a \cdot \mathbf{Z}_1 + e$$

1117 with  $e \sim P_e$ ,  $\mathbb{E}[e] = 0$  and  $e \perp\!\!\!\perp \mathbf{Z}_1$ . Given there is no  
 1118 unobserved confounding, the ground truth average treat-  
 1119 ment effect is written as

$$\text{ATE}(\mathbf{Z}_1 \rightarrow \mathbf{Z}_2) = \frac{\partial \mathbb{E}[\mathbf{Z}_2 \mid \text{do}(\mathbf{Z}_1 = \mathbf{z}_1)]}{\partial \mathbf{z}_1} = \frac{\partial \mathbb{E}[\mathbf{Z}_2 \mid \mathbf{Z}_1 = \mathbf{z}_1]}{\partial \mathbf{z}_1} = \frac{\partial \mathbb{E}[a\mathbf{z}_1 + e]}{\partial \mathbf{z}_1} = a. \quad (\text{F.1})$$

1120 We assume measurement function  $h_i$  for all  $i \in \{1, 2\}$  to be linear, i.e.,

$$\hat{\mathbf{Z}}_{A_1} = \alpha_1 \cdot \mathbf{Z}_1, \quad \hat{\mathbf{Z}}_{A_2} = \alpha_2 \cdot \mathbf{Z}_2, \quad \text{and} \quad \alpha_1, \alpha_2 \neq 0. \quad (\text{F.2})$$

1121 The ATE estimand from the learned representations yields:

$$\begin{aligned} \text{ATE}(\hat{\mathbf{Z}}_{A_1} \rightarrow \hat{\mathbf{Z}}_{A_2}) &= \frac{\partial \mathbb{E}[\hat{\mathbf{Z}}_{A_2} \mid \hat{\mathbf{Z}}_{A_1} = \hat{\mathbf{z}}_{A_1}]}{\partial \hat{\mathbf{z}}_{A_1}} \\ &= \frac{\partial \mathbb{E}[\alpha_2 \mathbf{Z}_2 \mid \alpha_1 \mathbf{Z}_1 = \alpha_1 \mathbf{z}_1]}{\partial \alpha_1 \mathbf{z}_1} \\ &= \frac{\alpha_2 \partial \mathbb{E}[\mathbf{Z}_2 \mid \mathbf{Z}_1 = \mathbf{z}_1]}{\alpha_1 \partial \mathbf{z}_1} = \frac{\alpha_2}{\alpha_1} a. \end{aligned} \quad (\text{F.3})$$

1122 As shown by eq. (F.3), the ATE estimand using the learned representation  $\hat{\mathbf{Z}}_{A_1}$  and  $\hat{\mathbf{Z}}_{A_2}$  can be arbi-  
 1123trarily scaled by the factor of  $\alpha_2/\alpha_1$ . Thus, measurements that bijectively transform the causal latent

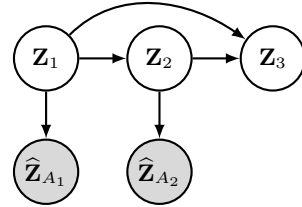

Figure 10:  $\hat{\mathbf{Z}}_{A_i}$  measures  $\mathbf{Z}_i$  through a nonlinear bijection for both  $i = 1, 2$ .

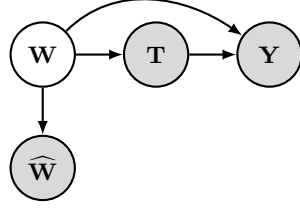

Figure 11: *ATE remains invariant under bijective transformation of confounders.* The treatment  $T$  and outcome  $Y$  are directly measured (i.e., observed) whereas confounder  $W$  is measured by  $\widehat{W}$  through a nonlinear bijection.

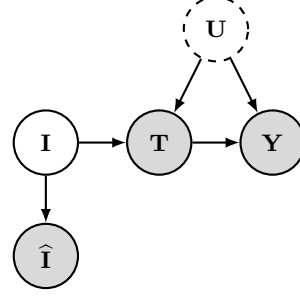

Figure 12: *ATE remains invariant under bijective transformation of instruments.*  $\widehat{I}$  measures the instrument variable  $I$  through a nonlinear bijection. The treatment  $T$  and outcome  $Y$  are directly measured (i.e., observed), and  $U$  denotes unobserved confounding.

variables cannot naively support estimating the treatment effect, violating causal validity (Defn. 2.2); it requires direct supervision or observation on *both* treatment and outcome variables, as also pointed out by (von Kügelgen et al., 2024, Sec. 4).

On the other hand, information-theoretic measures for quantifying causal influence remain invariant under bijective transformation, such as the mutual information  $I_{\text{int}}(\mathbf{Z}_1; \mathbf{Z}_2) = I_{\text{int}}(\widehat{\mathbf{Z}}_{A_1}; \widehat{\mathbf{Z}}_{A_2})$ , as shown by Janzing et al. (2013).

## F.2 Representations of Confounders or Instruments

**Measuring confounding.** We first show an example where an observed treatment  $T$  and an observed outcome  $Y$  is confounded by a third variable  $W$  which is measured by  $\widehat{W} = h(W)$  through a deterministic invertible function  $h$ .

Formally, the measurement model is defined as  $\mathcal{M}^{\text{conf}} = \langle \mathbf{Z}, \widehat{\mathbf{Z}}, \{h\} \rangle$  with  $\mathbf{Z} = \{T, Y, W\}$  and  $\widehat{\mathbf{Z}} = \{\widehat{W}\}$ , where  $T, Y$  are *directly measured* (Defn. 2.1). The corresponding DAG is given in Fig. 11. We show in the following that this measurement model is indeed causally valid (Defn. 2.2) with respect to the statistical estimand for the Average Treatment Effect (ATE) of  $T$  on  $Y$ .

Under the standard assumptions for backdoor adjustment, it follows that

$$\begin{aligned}
 \mathbb{E}(Y | do(T = t)) &= \mathbb{E}_{\mathbf{w}} [\mathbb{E}(Y | \mathbf{W}, T = t)] \\
 &= \int \mathbb{E}(Y | \mathbf{W}, T = t) P(\mathbf{W}) d\mathbf{w} \\
 &= \int \mathbb{E}(Y | h^{-1}(\widehat{\mathbf{W}}), T = t) P(h^{-1}(\widehat{\mathbf{W}})) \frac{dh^{-1}(\widehat{\mathbf{w}})}{d\widehat{\mathbf{w}}} d\widehat{\mathbf{w}} \\
 &= \int \mathbb{E}(Y | \widehat{\mathbf{W}}, T = t) P(\widehat{\mathbf{W}}) d\widehat{\mathbf{w}} \\
 &= \mathbb{E}_{\widehat{\mathbf{w}}} [\mathbb{E}(Y | \widehat{\mathbf{W}}, T = t)],
 \end{aligned} \tag{F.4}$$

where we used the change of variable formula and the fact that  $\mathbb{E}(Y | \widehat{\mathbf{W}}, T = t) = \mathbb{E}(Y | h^{-1}(\widehat{\mathbf{W}}), T = t)$ . This is because  $h^{-1}(\widehat{\mathbf{W}})$  is a sufficient statistic for  $\mathbf{W}$  (Casella and Berger, 2024, Ch. 6.2) following  $h$  is invertible.

Under the same assumptions, the ATE for *binary* treatment can then be identified by the following statistical estimand

$$\begin{aligned}
 \text{ATE}(T \rightarrow Y) &= \mathbb{E}[Y | do(T = 1)] - \mathbb{E}[Y | do(T = 0)] \\
 &= \mathbb{E}_{\mathbf{w}} [\mathbb{E}(Y | \mathbf{W}, T = 1) - \mathbb{E}(Y | \mathbf{W}, T = 0)].
 \end{aligned} \tag{F.5}$$

1144 Following eq. (F.4), we have

$$\text{ATE}(\mathbf{T} \rightarrow \mathbf{Y}) = \mathbb{E}_{\widehat{\mathbf{W}}} \left[ \mathbb{E}(\mathbf{Y} \mid \widehat{\mathbf{W}}, \mathbf{T} = 1) - \mathbb{E}(\mathbf{Y} \mid \widehat{\mathbf{W}}, \mathbf{T} = 0) \right],$$

1145 indicating that the identified statistical estimand  $\text{ATE}(\mathbf{T} \rightarrow \mathbf{Y})$  remains invariant for the measure-  
1146 ment  $\widehat{\mathbf{W}}$ . Similarly, ATE also remains invariant when the treatment is continuous:

$$\text{ATE}(\mathbf{T} \rightarrow \mathbf{Y}) = \frac{\partial \mathbb{E}[\mathbf{Y} \mid \text{do}(\mathbf{T} = t)]}{dt} = \frac{\partial \mathbb{E}_{\mathbf{W}} \mathbb{E}[\mathbf{Y} \mid \mathbf{W}, \mathbf{T} = t]}{dt} = \frac{\partial \mathbb{E}_{\widehat{\mathbf{W}}} \mathbb{E}[\mathbf{Y} \mid \widehat{\mathbf{W}}, \mathbf{T} = t]}{dt}, \quad (\text{F.6})$$

1147 where the last equality holds because of eq. (F.4). Therefore, we have shown that invertible reparam-  
1148 eterizations of the confounders can be a drop-in replacement of the true confounding variables in the  
1149 statistical estimand for ATE, for both discrete and continuous treatments, and thus this measurement  
1150 model  $\mathcal{M}^{\text{conf}}$  is indeed causally valid for ATE.

1151 **Measuring instrumental variables.** We now give a second example of ATE estimation under an  
1152 instrumental variable setup. We assume that the instrument  $\mathbf{I}$  is measured by  $\widehat{\mathbf{I}} = h(\mathbf{I})$  through  
1153 a bijective transformation  $h$ . We show that under certain assumptions, the statistical estimand  
1154 does not change when using  $\widehat{\mathbf{I}}$  as a drop-in replacement of the true instrument  $\mathbf{I}$ . We focus on the  
1155 case where the instrument  $\mathbf{I}$ , the treatment  $\mathbf{T}$ , and the response  $\mathbf{Y}$  are all univariate continuous  
1156 variables; further discussion on multivariate and discrete valued variables is beyond the scope of this  
1157 paper. Formally, the measurement model is defined as  $\mathcal{M}^{\text{IV}} = \langle \mathbf{Z}, \widehat{\mathbf{Z}}, \{h\} \rangle$  with causal variables  
1158  $\mathbf{Z} = \{\mathbf{I}, \mathbf{T}, \mathbf{Y}\}$  and measurement variables  $\widehat{\mathbf{Z}} = \{\widehat{\mathbf{I}}\}$ . The treatment  $\mathbf{T}$  and outcome  $\mathbf{Y}$  are *directly*  
1159 *measured* (Defn. 2.1) and confounded by unknown hidden confounders  $\mathbf{U}$ . Fig. 12 shows the DAG  
1160 of this measurement model.

1161 We show in the following that the instrument  $\mathbf{I}$  remains a valid instrumental variable under a bijective  
1162 transformation, i.e., the measurement variable  $\widehat{\mathbf{I}} = h(\mathbf{I})$  also satisfies the standard IV assumptions,  
1163 which are listed as follows:

- 1164 • Relevancy:  $\mathbf{I} \not\perp \mathbf{T} \mid \mathbf{U}$
- 1165 • Unconfoundedness:  $\mathbf{I} \perp \mathbf{U}$
- 1166 • Exclusion restriction criteria:  $\mathbf{I} \perp \mathbf{Y} \mid \mathbf{T}, \mathbf{U}$

1167 Following standard probability theory (see e.g., Billingsley, 2008), if  $h$  is a bijective function, all  
1168 three conditions still hold when replacing  $\mathbf{I}$  by  $h(\mathbf{I})$ . This means that if the ATE is identified by a  
1169 statistical estimand when using  $\mathbf{I}$  as an instrument, it is also identified when using  $\widehat{\mathbf{I}}$  as an instrument.  
1170 In other words, the measurement model  $\mathcal{M}^{\text{IV}}$  is causally valid with respect to an identified statistical  
1171 estimand because  $\widehat{\mathbf{I}}$  can serve as a drop-in replacement for  $\mathbf{I}$  (Defn. 2.2).

1172 As a specific example, consider the case where the causal mechanism of  $\mathbf{Y}$  is partially linear (a  
1173 commonly studied setup in the semi-parametric inference literature, see e.g., Chernozhukov et al.  
1174 (2018)), i.e.,  $\mathbf{Y} = \mathbf{T}\beta + g(\mathbf{U}, \varepsilon)$ , for some measurable function  $g$  where  $\mathbb{E}[g(\mathbf{U}, \varepsilon)] = 0$  and where  
1175  $\varepsilon \sim P_\varepsilon$  is an independent noise variable, the ATE

$$\text{ATE}(\mathbf{T} \rightarrow \mathbf{Y}) = \frac{\partial \mathbb{E}[\mathbf{Y} \mid \text{do}(\mathbf{T} = t)]}{\partial t} = \frac{\partial \mathbb{E}[t\beta + g(\mathbf{U}, \varepsilon)]}{\partial t} = \beta$$

1176 can be identified by the statistical estimand

$$\text{ATE}(\mathbf{T} \rightarrow \mathbf{Y}) = \frac{\text{Cov}(\mathbf{Y}, \mathbf{I})}{\text{Cov}(\mathbf{T}, \mathbf{I})}. \quad (\text{F.7})$$

1177 We show in the following that the statistical estimand  $\text{ATE}(\mathbf{T} \rightarrow \mathbf{Y})$  in eq. (F.7) remains invariant  
1178 when using  $\widehat{\mathbf{I}}$  as a drop-in replacement for  $\mathbf{I}$ . Plugging in  $\widehat{\mathbf{I}}$  in the numerator

$$\text{Cov}(\mathbf{Y}, \widehat{\mathbf{I}}) = \mathbb{E}[\mathbf{Y}\widehat{\mathbf{I}}] - \mathbb{E}[\mathbf{Y}]\mathbb{E}[\widehat{\mathbf{I}}] = \beta \left( \mathbb{E}[\mathbf{T}\widehat{\mathbf{I}}] - \mathbb{E}[\mathbf{T}]\mathbb{E}[\widehat{\mathbf{I}}] \right) = \beta \text{Cov}(\mathbf{T}, \widehat{\mathbf{I}}),$$

1179 we have  $\frac{\text{Cov}(\mathbf{Y}, \widehat{\mathbf{I}})}{\text{Cov}(\mathbf{T}, \widehat{\mathbf{I}})} = \beta = \frac{\text{Cov}(\mathbf{Y}, \mathbf{I})}{\text{Cov}(\mathbf{T}, \mathbf{I})}$ . Therefore, we have shown another example where the mea-  
1180 surement  $\widehat{\mathbf{I}}$  can serve as a drop-in replacement for the latent instrumental variable  $\mathbf{I}$  for downstream  
1181 causal inference tasks.
